# Supplementary material
Source: PubMed Central journal article supplement (PMC3334315)
Supplement: NIHMS351276-supplement-JAIDS_cover.pdf [file NIHMS351276-supplement-JAIDS_cover.pdf]

# Journal of Acquired Immune Deficiency Syndrome - Epidemiology

## Permissive and Protective Factors Associated With Presence, Level and Longitudinal Pattern of Cervicovaginal HIV Shedding

--Manuscript Draft--

|                                                      |                                                                                                                                                                                                                                                                                                                                                                                                                                                                                                                                                                                                                                                 |
|------------------------------------------------------|-------------------------------------------------------------------------------------------------------------------------------------------------------------------------------------------------------------------------------------------------------------------------------------------------------------------------------------------------------------------------------------------------------------------------------------------------------------------------------------------------------------------------------------------------------------------------------------------------------------------------------------------------|
| <b>Manuscript Number:</b>                            | QAIB3580R1                                                                                                                                                                                                                                                                                                                                                                                                                                                                                                                                                                                                                                      |
| <b>Full Title:</b>                                   | Permissive and Protective Factors Associated With Presence, Level and Longitudinal Pattern of Cervicovaginal HIV Shedding                                                                                                                                                                                                                                                                                                                                                                                                                                                                                                                       |
| <b>Article Type:</b>                                 | Original Article                                                                                                                                                                                                                                                                                                                                                                                                                                                                                                                                                                                                                                |
| <b>Keywords:</b>                                     | HIV-1; cervicovaginal; shedding; Plasma Viral Load; Inflammation; Antiretroviral therapy                                                                                                                                                                                                                                                                                                                                                                                                                                                                                                                                                        |
| <b>Corresponding Author:</b>                         | James Homans, M.D., M.P.H.<br>University of Southern California Keck School of Medicine<br>Los Angeles, California UNITED STATES                                                                                                                                                                                                                                                                                                                                                                                                                                                                                                                |
| <b>Corresponding Author Secondary Information:</b>   |                                                                                                                                                                                                                                                                                                                                                                                                                                                                                                                                                                                                                                                 |
| <b>Corresponding Author's Institution:</b>           | University of Southern California Keck School of Medicine                                                                                                                                                                                                                                                                                                                                                                                                                                                                                                                                                                                       |
| <b>Corresponding Author's Secondary Institution:</b> |                                                                                                                                                                                                                                                                                                                                                                                                                                                                                                                                                                                                                                                 |
| <b>First Author:</b>                                 | James Homans, M.D., M.P.H.                                                                                                                                                                                                                                                                                                                                                                                                                                                                                                                                                                                                                      |
| <b>First Author Secondary Information:</b>           |                                                                                                                                                                                                                                                                                                                                                                                                                                                                                                                                                                                                                                                 |
| <b>All Authors:</b>                                  | James Homans, M.D., M.P.H.<br>Shawna Christensen, MS<br>Wendy Mack, PhD<br>Tracey Stiller, MS<br>Kathryn Anastos, M.D.<br>Howard Minkoff, M.D.<br>Mary Young, M.D.<br>Ruth Greenblatt, M.D.<br>Mardge Cohen, M.D.<br>Howard Strickler, M.D.<br>Roksana Karim, MBBS, PhD<br>LaShonda Yvette Spencer, M.D.<br>Eva Operskalski, PhD<br>Toinette Frederick, PhD<br>Andrea Kovacs, M.D.<br>Chia-Hao Wang, PhD                                                                                                                                                                                                                                        |
| <b>All Authors Secondary Information:</b>            |                                                                                                                                                                                                                                                                                                                                                                                                                                                                                                                                                                                                                                                 |
| <b>Abstract:</b>                                     | <p>Background: Cervicovaginal HIV level (CV-VL) influences HIV transmission. Plasma viral load (PVL) correlates with CV-VL but discordance is frequent. We evaluated how PVL, behavioral, immunologic and local factors/conditions individually and collectively correlate with CV-VL.</p> <p>Methods: CV-VL was measured in cervicovaginal lavage fluid (CVL) over 976 person-visits for 481 HIV-infected women in a longitudinal cohort study. We correlated identified factors with CV-VL at individual person-visits and detectable/undetectable PVL strata by univariate and multivariate linear regression, and with shedding pattern</p> |

PVL strata by univariate and multivariate linear regression, and with shedding pattern (never, intermittent, persistent >3 shedding-visits) in 136 women with >3 visits by ordinal logistic regression.

Results: 450/959 (46.9%) of person-visits with available PVL were discordant. 435/959 (45.3%) had detectable PVL with undetectable CV-VL and 15/959 (1.6%) undetectable PVL with detectable CV-VL. Lower CV-VL correlated with HAART usage ( $P=0.01$ ). Higher CV-VL correlated with higher PVL ( $P<0.001$ ), inflammation-associated cellular changes ( $P=0.03$ ), cervical ectopy ( $P=0.009$ ), exudate ( $P=0.005$ ), and trichomoniasis ( $P=0.03$ ). In multivariate analysis of the PVL-detectable stratum, increased CV-VL correlated with the same factors and friability ( $P=0.05$ ), while with undetectable PVL, decreased CV-VL correlated with HAART use ( $P=0.04$ ). In longitudinal analysis, never (40.4%) and intermittent (44.9%) shedding were most frequent. Higher-frequency shedders were more likely to have higher initial PVL (OR=2.47/log<sub>10</sub> increase), HSV-2 seropositivity (OR=3.21) and alcohol use (OR=2.20).

Conclusions: While PVL correlates strongly with CV-VL, discordance is frequent. When PVL is detectable, cervicovaginal inflammatory conditions correlate with increased shedding. However, genital shedding is sporadic and not reliably predicted by associated factors. HAART, by reducing PVL, is the most reliable means of reducing cervicovaginal shedding.

December 18, 2011

Editorial Board  
Epidemiology Section  
Journal of Acquired Immune Deficiency Syndromes  
c/o Lori Barrett, Institute for Human Virology, University of Maryland  
725 W. Lombard Street, S419  
Baltimore, MD 21201

**Re: Permissive and Protective Factors Associated With Presence, Level, and Longitudinal Pattern of Cervicovaginal HIV Shedding**

Dear Editorial Board:

I am re-submitting the above-named manuscript to the Epidemiology section of your journal for evaluation for publication. In keeping with the advice and suggestions of the reviewers, I have made extensive revisions, and included new information to answer their queries. In this letter, I enumerate the changes and include explanations.

**Reviewer #1:**

Abstract

- Give % for number of visits with discordance / total number visits?

This was provided as follows:

**450/959 (46.9%) of person-visits with available PVL were discordant**

Introduction

- The sentence "? the temporal pattern of cervicovaginal HIV shedding has not been fully characterised." implies that there has been some attempt to characterise it. Could some references be added in here or further information given?

**Several references were added in the previous sentences and the sentences were changed to the following:**

**"Several studies have evaluated the variation in cervicovaginal HIV shedding over periods from days to weeks, particularly the possible influence of the menstrual cycle. However, the frequencies and determinants of different temporal patterns of cervicovaginal HIV shedding have not been fully characterized."**

Methods

- Please consider clarifying the final sentence of the first paragraph. I was not sure what was being described here.

**This sentence was expanded for further clarity as follows:**

**"All women who had quantitation of HIV-1 in cervicovaginal lavage fluid (CVL) at least once as part of several WIHS substudies between 11/9/1994 and 9/12/2001 were included in this study."**

- Please give details of the assay used for quantification of plasma HIV.

**These details were provided.**

- In some places I felt that the lab methods didn't tie up properly with the clinical methods. Perhaps this could be rewritten to be clearer.

**This section was extensively rewritten for better clarity and to provide definitions of terms that were used.**

- No information is given concerning ethical approval for the study?

**This information was included in the Acknowledgement section. In addition, the second sentence of the methods section describes the provision of informed consent.**

Results

- The first paragraph refers to 'active HSV'. Does this mean HSV ulcers?

**“Active HSV” means presence of consistent lesions with a positive culture.**

- In the first paragraph you refer to significant discordance between PVL and CV-VL - perhaps it would be more informative to say that discordance occurred about 50% of the time?

**The sentence was changed to the following:**

**“Discordance between PVL and CV-VL occurred in 47% of person-visits.”**

Discussion

- There were few visits among those with undetectable PVL when inflammatory conditions were also reported which I think limits the ability of the study to draw conclusions about the importance of these conditions in those with undetectable PVL?

**The last sentence of the 4th paragraph of this section acknowledges this limitation:**

**“However, the number of person-visits with undetectable PVL and cervicovaginal inflammation was insufficient to draw reliable conclusions.”**

General

- Given the results of a recent study reporting an increase in HIV transmission to partners of women using hormonal contraceptive (Heffron et al Lancet Infectious Diseases, 2011 Oct 3), it would be interesting to report the association between HIV shedding and hormonal contraceptive use (this data are reported to be available in the methods section). This other study showed an increased odds of genital HIV-1 RNA detection and an increased quantity.

**The statement is made in the first paragraph of the Results section that “Hormonal contraception was reported at 6% of person-visits,” and in the second paragraph that “CV-VL did not correlate with hormonal contraception use.”**

**Reviewer #2:** This paper, entitled "Permissive and Protective Factors Associated with Presence, Level and Pattern of Cervicovaginal HIV Shedding" is an in-depth analysis of factors associated with HIV-1 RNA level and pattern of detection among women participating in the WIHS cohort. In general, the analysis is well conducted and presented, although a few points are confusing and would benefit from revisions to increase clarity.

#### Major Revisions

1. Methods, p. 10. In ordinal logistic regression, an assumption of proportionality is made, such that the change coefficient going from each level to any higher level of the ordinal outcome variable (i.e., from none to intermittent, from intermittent to persistent) is the same. Was this assumption tested? If the proportionality assumption is not met, then multinomial logistic regression should be used.

**The assumption was tested and was met for all but two variables; detectable plasma viral load never and HSV2 serology unknown where the value for persistent shedding was 0 making the calculation unreliable. This is stated in the footnotes of Table 5**

2. Methods, p. 10. The modeling approach for the ordinal model is not explained well, or I have failed to understand the presentation. You state that multivariate analysis controlled for type of ART and PVL category, and the Table 5 presents "Models adjusted for ART and plasma." But then you also say "covariates included all those with  $P < 0.10$  in univariate analysis." Are the multivariate models in Table 5 also adjusted for covariates other than ART and plasma?

**The wording has been changed to reflect that the multivariate models were adjusted only for ART and plasma:**

**"Initial unadjusted analyses were performed using ordinal logistic regression followed by multivariate analyses, using all factors with  $P < 0.10$  in univariate analysis, controlling for type of ART (none, non-HAART, HAART) and PVL category."**

Similarly, the table footnote says "All factors were evaluated but only those with associations where  $p < 0.10$  are included in the table." Was that  $p < 0.10$  in either univariate or adjusted modeling? Inflammation (yes/no) seems to have  $p = 0.14$  in univariate analysis, yet is in the table. This seems to go against the statement above ("covariates included all those with  $P < 0.10$  in univariate analysis").

**The inflammation line in the table was removed, as the P-value was  $> 0.10$**

3. Results, p. 12. The terms "cervical inflammation-associated cellular changes" and "exudate" need definitions. How were these defined and measured?

**The term "Cervical inflammation-associated cellular changes" was based on the pathology interpretation of the Pap smear and was defined as follows:**

**"cellular changes found with inflammation including basophilic cytoplasm, enlarged unevenly-sized nuclei, enlarged, irregular or multiple nucleoli, repair"**

**The term “cervical exudate” was based on the visual inspection of the cervix by the person performing the pelvic examination and was defined as “any cervical discharge.” These definitions are now included in the text.**

4. Results, p. 13 In presenting the ordinal regression results, it should be made clear that the association was with increasing outcome category and not with "persistent" shedding. Because the name of the highest level of outcome category is used to describe the outcome, readers may become confused and believe that this was a logistic regression with a binomial outcome. The language should be clarified to clearly state that predictors were associated with increasing level of shedding, with the reference category of no shedding. The outcome could be described as pattern of shedding, to distinguish it from the analysis of factors associated with cervical HIV-1 RNA level.

**The language of this section was changed to reflect that this analysis evaluates increasing frequency of shedding:**

5. Discussion, p. 13. Throughout the discussion and elsewhere in the manuscript (even the title), "presence of shedding" is discussed. Correlates of shedding presence (yes/no) were not evaluated. I'd suggest deleting references to shedding presence to avoid confusion.

**Shedding presence was evaluated in Table 2 in evaluating discordance between PVL and presence/absence of HIV in cervicovaginal secretions, and also in the longitudinal analysis. Some references to shedding presence were deleted when level or frequency was meant.**

6. Discussion, p. 15. "and in that situation also correlated strongly with PVL magnitude." Are you saying that the correlation with PVL was dependent on inflammatory conditions? I don't believe an interaction term was tested. Was genital shedding present ONLY in the presence of inflammatory conditions? Please clarify.

**The statement was changed to read “With detectable PVL, CV-VL correlated significantly with inflammatory conditions and PVL.”**

**To further answer these questions, we defined a summary variable for inflammatory conditions, called Inflammation Summary Variable, as described in the statistical methods section, with value 1 when any of the significant local inflammation variables was present, and 0 when none was present, and correlated the value of this variable with whether PVL was undetectable or detectable at each person-visit. We found that shedding can occur in the absence of the inflammatory conditions we identified, albeit at a significantly lower frequency than when present. In addition, we used this variable in univariate and separate multivariate analyses in table 3 and univariate analysis in table 4. We found significant interaction between PVL and this summary variable in correlation of PVL with CV-VL. This is described in the text and detailed in table 3.**

7. Discussion, p. 17. Another limitation is that HIV-1 RNA was measured but integrated provirus in cells was not.

**A statement to this effect is added to the 7th paragraph of the discussion section:**

**“In addition, presence of intracellular integrated HIV-provirus was not evaluated, possibly leading to underestimation of HIV quantity in CVL.”**

8. Table 5. Several important footnotes seem to have been lost (all those after e), including the explanation for the summary variables.

**The footnotes were inadvertently cut and have now been restored.**

Minor Revisions

9. Introduction, p. 4. Reference 6 is a somewhat out-dated review article. A better reference here would be: Baeten JM, Kahle E, Lingappa JR, et al. Genital HIV-1 RNA predicts risk of heterosexual HIV-1 transmission. *Sci Transl Med.* 2011;3:77ra29. PMID: 21471433.

**The previous Reference 6 was deleted and this reference was added.**

10. Methods, p. 10. In the sentence spanning p. 9-10, consider deleting the text on page 10 after "excluded from this analysis." The additional text "but all visits with quantifiable PVL were included, in addition to those with PVL<80 copies/mL (n=925)" seems unnecessary.

**This text was removed.**

11. Methods, p. 10. Sometimes the word "consistent" is used instead of "persistent." I would suggest choosing one to avoid confusion.

**The word “consistent” was removed when its meaning was equivalent to “persistent.”**

12. Results, p. 11-12. In the presentation of data on discordance, the four categories could be presented in order of frequency so that it is made clearer that undetectable PVL with detectable CVL is a rare occurrence.

**The four categories have been presented in order of frequency, from greatest to smallest.**

13. Discussion, p. 14. It is not clear that this study assessed "how major changes in HIV treatment affect cervicovaginal shedding." There is certainly no analysis of shedding at the time of regimen changes. There is little discussion of the effect of ART practice evolution on shedding, so I might recommend dropping or modifying this text.

**This text was deleted.**

14. Discussion, p. 14. The text "while the longitudinal analysis clarifies how behaviors and conditions, either present at the initial visit or manifested over the study period,?" could be confusing, as it seems to contrast the individual visit analysis with a longitudinal analysis. If I understand correctly, the individual visit analysis used GEE and time-dependent covariates. The ordinal regression analysis used covariates from the first evaluable visit. So the analysis that evaluated the temporal pattern of shedding did not, in fact, clarify how predictors that manifested over the study period affected the temporal pattern of shedding. Perhaps this could be reworded?

**The summary variables are manifested over the entire study period. For greater clarity, the statement was reworded as follows:**

**“while the longitudinal analysis clarifies how behaviors and conditions present at the initial visit, as well as summary variables measuring HAART adherence and PVL suppression over all visits, correlate with the temporal pattern of shedding.”**

15. Discussion, p. 15. Suggest "compromised" instead of "less staunch bloodstream-tissue barrier."

**The wording “less staunch” was replaced by “compromised.”**

16. Discussion, p. 15. "If, with detectable PVL, HIV shedding in cervicovaginal secretions were due predominantly to local replication, undetectable CV-VL in this situation would be rare rather than frequent, because factors leading to HIV presence in blood would also promote local replication." This sentence is not clear as written. Do you mean to say that local genital tract replication seems to be influenced by different factors than systemic replication, and may be triggered infrequently, given the substantial number of women with no genital RNA detected despite unsuppressed plasma viral load? Please consider reworking this sentence.

**This statement was deleted as being too speculative. However, while local genital tract replication may be influenced by many of the same factors as systemic replication, it may also be influenced by other factors as well. While there is a suggestion that one of these factors is subclinical HSV-2 activity, our study is unable to draw reliable conclusions.**

17. Discussion, p. 15. The sentence "However, the number of person-visits with cervicovaginal shedding despite undetectable PVL was low (15/196, 7.6%)" seems out of place. I'd suggest moving this text earlier in the paragraph where you state that "Conversely, in the person-visit stratum where PVL was undetectable, cervicovaginal shedding was rare (15/196, 7.6%) and increased shedding did not correlate with local inflammatory conditions."

**This paragraph was reworked to avoid repetition.**

18. Discussion, p. 16. The word "an" is missing in paragraph 2: "Interestingly, we noted an association between alcohol use?"

**The word “an” was added.**

19. Discussion, p. 17. The first paragraph on this page seems to come late, after you have already discussed possible reasons for the discordance on page 15. Consider moving this paragraph forward, and omitting sections that are redundant (7.6% and 58% numbers appear twice in the discussion).

**The two paragraphs discussing reasons for discordance were combined and redundant sections and numbers were omitted.**

20. Discussion, p. 17. You state that an observational study cannot determine causation, then use the word "cause" later in this paragraph. Suggest a revision to "Relatively few person-visits had



undetectable PVL, making it difficult to draw conclusions about all but very strong associations with shedding in this group."

**The word "cause" was omitted where it cannot be supported. The sentence was modified to the following:**

**"However, the number of person-visits with undetectable PVL was insufficient to draw reliable conclusions about all but very strong associations in this stratum."**

21. Table 5. The title should be "Associations with HIV-1 Genital Shedding Pattern", not "Persistence".

**The title was modified to the following:**

**"Association of Demographic, Behavioral, Virologic, and Clinical Factors with HIV-1 Genital Longitudinal Shedding Pattern Among 136 Participants with 3 or More Visits."**

22. Table 5. I would suggest an extra row or line break before the presentation of the summary ART and plasma variables, to indicate the difference in approach.

**An extra row was added.**

In addition to these suggested revisions, several other changes were made as follow.

**The Abstract was changed slightly: In the Results section, the phrase "persistent shedders" was changed to "higher-frequency shedders."**

**An additional co-author was added: Chia-Hao Wang PhD.**

**The title was changed to Permissive and Protective Factors Associated With Presence, Level and Longitudinal Pattern of Cervicovaginal HIV Shedding.**

**Table 2 was modified. Information on the Inflammation Summary Variable was added to this table, detailing its value in each of the categories, and analyzing the information for significance. The Inflammation Summary Variable was also included in the analyses in tables 3 and 4. In table 3, an interaction coefficient between PVL and the Inflammation Summary Variable was calculated, and these results are described in the text and shown in the footnotes as well.**

**Numerous smaller changes were made in wording and phrasing for clarity and to keep within the word limit.**

We hope that these explanations, revisions and changes will be helpful in clarifying any points and concepts that are unclear in our manuscript, as well as in providing further support for our conclusions.

Thank you very much for your kind re-evaluation of our manuscript. Please do not hesitate to contact me if you have questions or need further information

Sincerely yours,

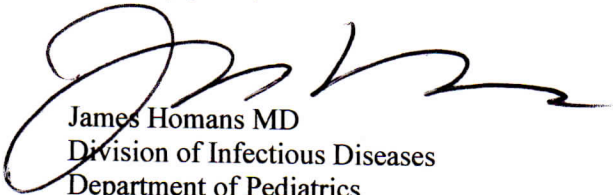A handwritten signature in black ink, appearing to read 'J. Homans', with a large, stylized initial 'J'.

James Homans MD  
Division of Infectious Diseases  
Department of Pediatrics  
University of Southern California School of Medicine  
Phone: 3232265068

**Background:** Cervicovaginal HIV level (CV-VL) influences HIV transmission. Plasma viral load (PVL) correlates with CV-VL but discordance is frequent. We evaluated how PVL, behavioral, immunologic and local factors/conditions individually and collectively correlate with CV-VL.

**Methods:** CV-VL was measured in cervicovaginal lavage fluid (CVL) over 976 person-visits for 481 HIV-infected women in a longitudinal cohort study. We correlated identified factors with CV-VL at individual person-visits and detectable/undetectable PVL strata by univariate and multivariate linear regression, and with shedding pattern (never, intermittent, persistent  $\geq 3$  shedding-visits) in 136 women with  $\geq 3$  visits by ordinal logistic regression.

**Results:** 450/959 (46.9%) of person-visits with available PVL were discordant. 435/959 (45.3%) had detectable PVL with undetectable CV-VL and 15/959 (1.6%) undetectable PVL with detectable CV-VL. Lower CV-VL correlated with HAART usage ( $P=0.01$ ). Higher CV-VL correlated with higher PVL ( $P<0.001$ ), inflammation-associated cellular changes ( $P=0.03$ ), cervical ectopy ( $P=0.009$ ), exudate ( $P=0.005$ ), and trichomoniasis ( $P=0.03$ ). In multivariate analysis of the PVL-detectable stratum, increased CV-VL correlated with the same factors and friability ( $P=0.05$ ), while with undetectable PVL, decreased CV-VL correlated with HAART use ( $P=0.04$ ). In longitudinal analysis, never (40.4%) and intermittent (44.9%) shedding were most frequent. Higher-frequency shedders were more likely to have higher initial PVL (OR=2.47/ $\log_{10}$  increase), HSV-2 seropositivity (OR=3.21) and alcohol use (OR=2.20).

**Conclusions:** While PVL correlates strongly with CV-VL, discordance is frequent. When PVL is detectable, cervicovaginal inflammatory conditions correlate with increased

shedding. However, genital shedding is sporadic and not reliably predicted by associated factors. HAART, by reducing PVL, is the most reliable means of reducing cervicovaginal shedding.

**Introduction:**

Worldwide, 33.4 million people are infected with human immunodeficiency virus type 1 (HIV) with an estimated 2.7 million new infections yearly.<sup>1</sup> Most infections are acquired sexually or perinatally. Higher plasma viral load (PVL) correlates with increased likelihood of sexual and perinatal transmission, while antiretroviral treatment (ART), in particular highly active antiretroviral therapy (HAART), correlates with reduced transmission.<sup>2-5</sup> HIV presence in the female genital tract is important in perinatal<sup>4</sup> and sexual transmission.<sup>6</sup> Increased cervicovaginal HIV level (CV-VL) likely increases risk of transmucosal HIV passage during penile-vaginal intercourse and vaginal delivery.

The quantity of HIV in the female genital tract correlates with various factors, including PVL,<sup>7</sup> immune status,<sup>8</sup> cervicovaginal inflammation,<sup>9</sup> and ART.<sup>10;11</sup> HIV characteristics, including tropism and resistance pattern, can differ markedly in different compartments, including the female genital tract,<sup>12;13</sup> male genital tract,<sup>14</sup> and central nervous system.<sup>15;16</sup> HIV can be detected in cell-free and cell-associated components of cervicovaginal fluid.<sup>17</sup> Local conditions in the female genital tract including inflammation,<sup>18</sup> bacterial vaginosis,<sup>19</sup> cervical ectopy,<sup>20</sup> genital ulceration,<sup>18</sup> candidiasis,<sup>21</sup> HSV,<sup>22</sup> trichomoniasis,<sup>20</sup> and other infections influence cervicovaginal HIV shedding. Menstrual cycle phase<sup>23;24</sup> and hormonal contraception<sup>25</sup> may affect shedding. ART, in particular HAART, is associated with decreased cervicovaginal HIV shedding.<sup>11;26</sup>

Discordance between HIV presence in the bloodstream and cervicovaginal shedding is frequent. HIV can be present in the genital tract despite undetectable PVL, suggesting local replication.<sup>27;28</sup> Factors that may cause increased cervicovaginal shedding due to local replication include poor penetration of antiretrovirals into genital secretions,<sup>29</sup> local resistance,<sup>13</sup> and local inflammation.<sup>28</sup> Conversely, HIV is sometimes absent from genital secretions despite high PVL, suggesting that additional factors may be necessary to permit shedding.

While previous studies have shown association between numerous conditions and cervicovaginal HIV shedding, the mechanisms for presence and level of HIV in the cervicovaginal compartment are not well understood.<sup>28</sup> Several studies have evaluated the variation in cervicovaginal HIV shedding over various time-periods, particularly the possible influence of the menstrual cycle.<sup>23;24;30;31</sup> However, the frequencies and determinants of different temporal patterns of cervicovaginal HIV shedding have not been fully characterized. The purpose of this study is to evaluate how behavioral, therapeutic, clinical, immunologic and local factors correlate, individually and collectively, with cervicovaginal HIV shedding, at single time-points and as a longitudinal pattern.

## **Methods**

### **Study Population**

This sub-study was nested within the Women's Interagency HIV Study (WIHS), an ongoing multicenter, prospective study of the natural and treated history of HIV infection

in women.<sup>32</sup> WIHS participants provide informed consent for their participation in keeping with local, institutional and national guidelines. All women who had quantitation of HIV-1 in cervicovaginal lavage fluid (CVL) at least once as part of several WIHS substudies between 11/9/1994 and 9/12/2001 were included in this study.<sup>7;33</sup>

### **Clinical Data**

WIHS methods have been described.<sup>32</sup> At baseline and each semiannual visit, subject history, including health information, medications including antiretrovirals, sexual history, substance use and other behavioral data were obtained using a standardized interview. Physical and gynecological examinations were performed. Blood and gynecological specimens were collected for local testing and repository storage. Genital tract assessment included visual inspection, speculum, and sometimes bimanual and rectal examination. Cervical lesions (ulcers, vesicles, fissures, or warts), ectopy ("beefy" redness extending from os onto cervix), friability (erythematous tissue that bleeds easily), exudate (discharge of any type) were ascertained visually. CVL was collected by spraying 10 mL of sterile, non-bacteriostatic saline against the cervical os and endocervix and aspirating from the posterior vaginal fornix. Unfractionated CVL was stored at -70°C.

### **Laboratory Data**

Blood analyses included complete blood count, lymphocyte subsets, and plasma HIV RNA (PVL). We determined lymphocyte subsets with standard flow cytometric techniques at local laboratories. Baseline serology for HSV-1, HSV-2 and syphilis

screening were performed with Western Blot and rapid plasma reagin (RPR) test respectively in a central laboratory.<sup>32</sup> Baseline HCV antibody testing was performed by Abbott enzyme immunoassays (version 2.0 or 3.0). HCV RNA levels were measured in a single laboratory (University of Southern California) by polymerase chain reaction (Roche Diagnostics).<sup>34</sup> Baseline hepatitis B profile was also performed in local laboratories.

We collected whole blood for PVL determination in sodium citrate cell preparation tubes. Plasma HIV quantitation was completed in four central laboratories. Initially, PVL was measured with a nucleic acid sequence-based amplification technique (Organon Teknika Corp, Durham, NC), with lower threshold of detection of 4000 copies/mL. Similar methods with greater sensitivity were used as they became available. WIHS currently uses the NucliSens (Organon Teknika Corp) assay for quantification of HIV RNA in plasma with a lower limit of detection (LLD) of 80 copies/mL with 1 mL of sample input. In general, at the beginning of the study period (visits 1-7), PVL had an LLD of 4000 copies/mL, while for visits 7-9 it improved to 400 copies/mL, and from visit 10 onward to 80 copies/mL. HIV quantitation in CVL (CV-VL) used the NucliSens assay (LLD of 80 copies/mL). However, these changes occurred in the laboratories at different times.

Cervicovaginal specimens included vaginal swabs for pH, potassium hydroxide preparation, candida culture, saline preparation for microscopy, Gram stain, swabs for HSV culture if cervical/vaginal ulcer, fissure, or vesicle present, syphilis if



ulcer/fissure/vesicle(s) present, endocervical swabs for gonorrhea/chlamydia nucleic acid detection tests and trichomonas culture, and a Papanicolaou (Pap) smear. CVL was tested for microscopic blood and semen. Pap smears were read in a central laboratory (Kyto Diagnostics New York, N.Y.). Squamous metaplasia (replacement of one normal type of epithelium with another), endocervical cells, inflammation (leukocytes on Pap smear), and inflammation-associated cellular changes (cellular changes found with inflammation including basophilic cytoplasm, enlarged unevenly-sized nuclei, enlarged, irregular or multiple nucleoli, repair) were ascertained from Pap smear. Gram stains were interpreted for bacterial vaginosis (BV) in a central laboratory (University of Washington) using the Nugent score criteria, with categorization as normal (0-3), intermediate (4-6), or consistent(7-10).<sup>35</sup> Trichomoniasis was diagnosed if motile trichomonads were present on wet mount or with positive culture. Candidiasis was diagnosed by pseudohyphae presence on potassium hydroxide preparation or positive culture. PCR to identify 29 types of humanpapillomavirus (HPV) was performed in central laboratories.<sup>36</sup> We analyzed separately several high-risk types of HPV (16, 18, 31, 33, 35).

### **Statistical Methods**

Demographic covariates included age (categorized as <35, 35-40, 41+) and self-identified race/ethnicity (White, African-American, Hispanic, Other). HIV exposure category (intravenous drug use, heterosexual risk, transfusion risk, no identified risk, unknown) was specified. Behavioral covariates included current smoking (no, yes), current alcohol consumption (abstainer, <3, 3-13,  $\geq$ 14 drinks/week), current injection drug use (no, yes), current use of other recreational substances (marijuana, cocaine, heroin, other), number

of lifetime male sex partners (0-6, 7-29, 30+), number of male sex partners since last study visit (0, 1, 2+), and vaginal sex with male in past 48 hours (no, yes). Therapeutic, immunologic, and clinical covariates included type of ART used since last visit (none, monotherapy, combination therapy, HAART), hormonal contraceptive use in past 6 months (no, yes), PVL, CD4 cell count ( $\leq 200$ , 201-350, 351-500, and  $>500$  cells/mm<sup>3</sup>), prior history of an AIDS-defining illness, hepatitis C status at baseline (antibody negative, antibody positive/RNA negative, antibody positive/RNA positive), and seropositivity for HSV-1 and HSV-2. The definition of HAART was guided by the DHHS/Kaiser Panel 2008.<sup>37</sup> Local cervicovaginal covariates included vaginal pH ( $<4.5$ , 4.5-5.4,  $\geq 5.5$ ), abnormal Pap (no, yes), bacterial vaginosis score,<sup>35</sup> and presence of the following: friability, ectopy, exudate, lesions, candidiasis, *Trichomonas vaginalis*, endocervical cells, squamous metaplasia, cervicovaginal inflammation, inflammation-associated cellular changes, and HPV (all types, oncogenic types).

**Individual visit analysis, level of shedding:** This analytic approach correlated data from individual person-visits with level of CV-VL. To accommodate multiple visits per subject, regression models utilized generalized estimating equations with an exchangeable correlation matrix and an identity link function. The dependent variable for this linear regression model was  $\log_{10}$ CV-VL. Visits where the CV-VL was less than the LLD (80 copies/ml) were assigned a value of  $\frac{1}{2}$  LLD (40). Visit-specific covariates were used from each visit at which CV-VL was measured. Plasma HIV RNA was analyzed both as categorical ( $\leq 4000$ , 4001-9999, 10000-39999, 40000-99999,  $\geq 100,000$  copies/mL), where  $\leq 4000$  copies/mL was modeled as the referent group, and as a  $\log_{10}$ -

transformed continuous variable, where values less than the LLD for the assay used were assigned a numeric value of  $\frac{1}{2}$ LLD. Factors were evaluated in unadjusted and multivariate models. The multivariate model retained factors associated with CV-VL in unadjusted analyses at  $P < 0.10$  that remained at  $P < 0.10$ . Associations were summarized as  $\beta$ -coefficients with associated standard errors. Two-sided hypotheses were assessed at the 5% significance level. Finally, we stratified person-visits into groups with detectable ( $\geq 80$  copies/ml) and undetectable ( $< 80$  copies/ml) PVL and performed similar analyses on these strata to determine shedding associations with PVL detectable or undetectable. Person-visits with undetectable PVL when LLD was 400 copies/mL ( $n=24$ ) and 4000 copies/mL ( $n=10$ ) were excluded from this analysis.

In order to better understand the role of cervicovaginal inflammation as a condition in shedding we devised a tool to assess the presence/absence of any cervicovaginal inflammatory condition associated with shedding. We defined a binary variable, called inflammation summary variable (ISV), to have the value “1” if any local inflammatory factor significantly associated with CV-VL on univariate analysis was present (inflammation-associated cellular changes, cervical ectopy, exudate, friability, lesions, vaginal pH  $> 5.5$ , intermediate BV score, consistent BV score, trichomoniasis) and “0” if none was present. Using this variable, we used Fisher’s exact test to evaluate for interaction between PVL detectability and inflammation (by ISV value) in correlation with shedding presence (Table 2). We used the generalized estimating equation to test for interaction between cervicovaginal inflammation and PVL in correlation with CV-VL.

**Analysis of longitudinal shedding pattern:** This analytic approach categorized subjects into three groups to evaluate the pattern of cervicovaginal shedding over a series of visits. Categories were defined as follows: “never shedder” if a subject had no visits at which HIV was detected in cervicovaginal secretions, “intermittent shedder” if she had shedding at one or two visits, “persistent shedder” if she had shedding at three or more visits. Shedding category was assigned a three-level variable (coded 0, 1, 2) corresponding to never, intermittent and persistent shedding, respectively. For uniformity, this analysis was restricted to all subjects with at least three visits over a three-year period where at most one semiannual visit could be missed between evaluable visits. Data included visits from 3/31/1998-9/12/2001. Independent variables were the same as in the individual visit analysis, but taken from the first evaluable visit. PVL was analyzed as a categorical variable ( $\leq 400$ , 401-3999, 4000-19999, and  $\geq 20000$  copies/mL) and as a  $\log_{10}$ -transformed continuous variable, where values less than the LLD for a particular assay were assigned a numeric value of  $\frac{1}{2}$  LLD. Summary variables were created to characterize the pattern of HAART use (none, intermittent, always) and PVL detection (always, sometimes, never) over the evaluated visits. Initial unadjusted analyses were performed using ordinal logistic regression followed by multivariate analyses, using all factors with  $P < 0.10$  in univariate analysis, controlling for type of ART (none, non-HAART, HAART) and PVL category. Similarly, unadjusted analyses and analyses adjusting for initial PVL were performed on the subgroup of patients with “always-detectable PVL,” but not on the “sometimes” and “never-detectable” groups, due to insufficient cases of persistent shedding (2/50 and 0/24, respectively).

## Results

**Study Population:** 481 women had a total of 976 visits at which genital shedding was evaluated. Baseline demographic and clinical characteristics of the study population are summarized in **Table 1**. The median number of person-visits was 1. 31% had 3 or more person-visits. The median age at baseline was 36.3 years. 52% of women were African American and 33% Hispanic. 29.6% had baseline plasma viral load below 4000 copies/mL (median=16,000 copies/mL), while 25.5% had CD4  $\geq$  500 cells/mm<sup>3</sup>.

Tobacco use was reported at 38% of person-visits. Hormonal contraception was reported at 6% of person-visits. The distribution of risky behaviors included: heavy alcohol use, 11%, injection drug use, 36.5%, and >30 lifetime sex partners, 35.9%. Few women had evidence of chlamydia, 0.2%, gonorrhea, 0%, or active HSV at baseline, 0.2%. HSV seropositivity was common, HSV-1: 83%; HSV-2: 77%. 17.2% had a positive screening test for syphilis (RPR). Other cervicovaginal infections present at baseline included trichomoniasis, 11.8%, HPV (all types) 52.7%, bacterial vaginosis (Nugent score 7-10) 47.1%. The percentage of participants receiving HAART increased from 0.3% at the initial visit where shedding was measured to 70% by the last visit of the study period.

**Discordance between PVL and CV-VL:** Subgroups of person-visits stratified with respect to PVL, CV-VL, cervicovaginal inflammation and antiretroviral therapy are shown in **Table 2**. Discordance between PVL and CV-VL occurred in 47% of person-visits. In 959 person-visits with measured PVL, 45.3% had detectable PVL/undetectable CV-VL, 32.6% detectable PVL/detectable CV-VL, 20.4% undetectable PVL and CV-VL, and 1.6% had undetectable PVL/detectable CVL. Significant inflammation, expressed by

the “inflammation summary variable,” was present in 76.5% and absent at 23.5% of evaluable person-visits (n=958). CV-VL was detectable in 37.4% of person-visits at which inflammation was present (ISV=1) and 24% at which it was absent (ISV=0). When PVL was detectable, CV-VL was detectable in 264/587 (44.9%) of person-visits with inflammation presence and 48/160 (30%) with absence. In the sub-group with  $PVL \geq 80$  (LLD=80), shedding was significantly more likely with inflammation present (ISV=1) ( $P=0.003$ ).

**Factors associated with level of shedding at individual person-visits:** Table 3 shows variables associated with CV-VL level at individual person-visits. In multivariate analysis, higher CV-VL correlated significantly with higher PVL ( $\beta=0.50$  per  $\log_{10}$ copies/mL;  $P < 0.001$ ), cervical inflammation-associated cellular changes ( $\beta=0.38$ ;  $P=0.03$ ), ectopy ( $\beta=0.48$ ;  $P=0.009$ ), exudate ( $\beta=0.18$ ;  $P=0.005$ ), and trichomoniasis ( $\beta=0.31$ ;  $P=0.03$ ). Lower CV-VL correlated with HAART use ( $\beta=-0.17$ ;  $P=0.01$ ). CV-VL did not correlate with hormonal contraception use. The inflammatory summary variable correlated with increased CV-VL in univariate analysis ( $\beta=0.29$ ;  $P < 0.001$ ), and in a separate multivariate model with  $\log_{10}$ HIV-RNA and antiretroviral therapy ( $\beta=0.16$ ;  $P=0.004$ ). PVL had significant interaction with the inflammation summary variable in correlating with CV-VL (interaction coefficient 0.26,  $P=0.006$ ). Multivariate analysis (Table 4) of the PVL-detectable stratum (n=665) showed strong correlation between higher CV-VL and PVL (for  $>100,000$  copies/mL  $\beta=0.80$ ;  $P < 0.001$ ), friability ( $\beta=0.23$ ;  $P=0.05$ ), ectopy ( $\beta=0.46$ ;  $P=0.02$ ) exudate ( $\beta=0.25$ ;  $P=0.001$ ), trichomoniasis ( $\beta=0.33$ ;  $P=0.04$ ), and inflammation-associated cellular changes ( $\beta=0.61$ ;  $P=0.007$ ). In

multivariate analysis of the PVL-undetectable stratum (n=132 person-visits), cervicovaginal inflammatory conditions did not correlate with CV-VL. As expected, HAART correlated with decreased CV-VL ( $\beta=-0.39$ ;  $P=0.04$ ).

**Factors associated with pattern of genital shedding over multiple visits (Table 5).** Of 481 evaluable women, 136 (31%) had CVL-VL measured at 3 or more visits within a 3-year period with a median of four evaluable visits (range: 3-6). The shedding distribution included: 40.4% (n=55) “never,” 44.9% (n=61) “intermittent,” and 14.7% (n=20) “persistent.” Ordinal logistic regression adjusted for ART showed that a pattern of higher frequency of shedding over visits (i.e., intermittent/persistent vs. never; or persistent vs. intermittent/never) was associated with higher initial PVL (OR= 2.47 per  $\log_{10}$ copies/mL;  $P<0.01$ ; Table 5). With adjustment for ART and PVL, higher shedding frequency also correlated with any alcohol use (OR=2.20;  $P=0.03$ ) and seropositivity for HSV-2 (OR=3.21;  $P=0.009$ ). Never detectable PVL correlated strongly with lower likelihood of higher shedding frequency (OR=0.10;  $P<0.001$ ). Even in the subgroup with always detectable PVL, 18/62 (29%) had persistent shedding, but 20/62 (32%) never shed and 24/62 (39%) shed intermittently. In this subgroup, higher shedding frequency correlated with alcohol use (OR=4.92;  $P=0.003$ ) and HSV-2 seropositivity (OR=4.44;  $P=0.04$ ) (**Table 6, supplemental digital content**). Additionally in this subgroup, vaginal candidiasis correlated with a 15-fold increase in the odds of higher shedding frequency (OR=15.14;  $P=0.009$ ).

## **Discussion**

This study comprehensively assessed demographic, behavioral, clinical, therapeutic and local factors that correlate individually and collectively with level and pattern of HIV shedding in the female genital tract both at individual person-visits (cross-sectionally) and longitudinally. The two analytic approaches are complementary. The person-visit analysis elucidates the association between identified factors and CV-VL at individual time-points, while the longitudinal analysis clarifies how behaviors and conditions present at the initial visit, as well as summary variables measuring HAART adherence and PVL suppression over all visits, correlate with the temporal pattern of shedding. Subanalyses shed light on discordance between PVL and cervicovaginal HIV presence, level, and pattern.

As shown previously,<sup>11;26;38</sup> at individual person-visits PVL and HAART are the principal factors associated with CV-VL, correlating with higher and lower levels, respectively. Correlation between PVL and CV-VL may be direct, due to transmigration of cell-free or cell-associated HIV from the bloodstream, indirect, related to local replication responding to the same factors as systemic replication, or both. Similarly, HAART may influence CV-VL directly by reducing local replication, indirectly by reducing HIV bloodstream replication, or both. Consistent with previous studies,<sup>18;39;40</sup> local inflammatory conditions, diagnosed clinically, such as exudate, ectopy, friability, and presence of lesions, microbiologically, such as *Trichomonas vaginalis*, and histologically, such as inflammation-related cellular changes correlated significantly with increased shedding in the person-visit analysis.



How local inflammatory conditions lead to increased cervicovaginal HIV shedding is not well understood. There may be several mechanisms, and their order of importance may vary depending on circumstances. Cervicovaginal inflammation may increase vascular permeability, allowing HIV transmigration from bloodstream to cervicovaginal compartment.<sup>18</sup> Local inflammation may directly stimulate HIV replication, or lead to recruitment of HIV-producing leukocytes from adjacent lymphoid tissue.<sup>22;39</sup> When HIV is undetectable in the bloodstream, local replication, allowed by inadequate antiretroviral levels or resistance, may lead to detectable HIV in cervicovaginal secretions. Some authorities suggest that the source of most inflammation-associated cervicovaginal HIV is local replication.<sup>18;39</sup>

There was significant discordance between PVL and CV-VL both at individual person-visits and as a pattern. Similar to previous studies,<sup>27;28</sup> CV-VL was detectable at 7.6% (15/211) of person-visits when PVL was undetectable. Surprisingly, CV-VL was undetectable at 58% (436/748) of person-visits when PVL was detectable. With detectable PVL, CV-VL correlated significantly with inflammatory conditions and PVL. Indeed, inflammation presence (ISV=1) led to increased correlation between PVL and CV-VL. This suggests that, when local inflammatory conditions are present, a significant amount of HIV in cervicovaginal secretions is due to transmigration from the bloodstream, rather than local replication, likely due to a compromised bloodstream-tissue barrier. However, even in the absence of cervicovaginal inflammation, CV-VL was sometimes detectable. Conversely, in the undetectable PVL stratum, increased shedding

did not correlate with local inflammatory conditions. This suggests that, when antiretroviral suppression is effective, cervicovaginal inflammatory conditions are insufficient to cause shedding. HAART correlated with decreased CV-VL in the entire group and was the only factor to correlate with decreased CV-VL in the PVL-undetectable stratum. Though the main protective effect of HAART stems from PVL suppression, an additional protective effect may be suppression of cervicovaginal HIV replication, particularly when PVL is already low or undetectable. However, the number of person-visits with undetectable PVL was insufficient to draw reliable conclusions about all but very strong associations in this stratum.

In longitudinal analysis, even with always undetectable PVL, intermittent CVL shedding was sometimes present (5/24 subjects). Conversely, many subjects with always detectable PVL never had CVL HIV shedding (20/62 subjects). Persistent shedding in this group was associated with inflammatory factors such as HSV-2 seropositivity and vaginal candidiasis, as well as alcohol use. Thus, the longitudinal pattern of shedding correlates not only with HIV levels in the bloodstream, but also with factors leading to cervicovaginal inflammation.

Interestingly, we noted an association between alcohol use and shedding persistence. Association between alcohol use and cervicovaginal shedding was demonstrated in one previous study.<sup>41</sup> This is plausible, as alcohol affects HIV replication and susceptibility, causing increased SIV replication in animal models,<sup>42</sup> and increased HIV replication in PBMCs and susceptibility of CD4 lymphocytes to HIV infection *in vitro*.<sup>43</sup> No other

behavior, including recent sexual intercourse, was associated with increased cervicovaginal shedding. Similar to previous studies,<sup>44</sup> HSV-2 seropositivity without overt lesions correlated with shedding persistence. This may be due to inflammation from low-grade HSV replication.

Our study has several limitations. An observational study, it cannot determine causation. During the study period there were major changes in HIV quantitation and treatment and resultant population health status. HIV levels in cervicovaginal secretions were measured in CVL, a semiquantitative method, rather than more precise means, such as cervical wick or swab. In addition, presence of intracellular integrated HIV-provirus was not evaluated, possibly leading to underestimation of HIV quantity in CVL.

**Conclusions:** Undetectable PVL due to effective HAART is strongly associated with reduced CV-VL, but does not assure shedding absence.<sup>28</sup> Conversely, cervicovaginal HIV shedding may be undetectable without antiretroviral therapy and with high PVL. When HIV is present in the bloodstream, “permissive” factors, conditions or behaviors associated with cervicovaginal inflammation, correlate with increased shedding. “Protective” factors include HAART and control of such conditions or behaviors. Therefore, prediction of cervicovaginal HIV shedding solely on the basis of ART and PVL is unreliable. As a practical matter, HIV-infected women should be counseled that cervicovaginal inflammatory conditions may increase risk of sexual transmission of HIV, and medical providers advised to diagnose and treat such conditions as a means of reducing HIV transmission. Serodiscordant couples with perfect HAART adherence and

consistently undetectable PVL in the infected partner should be advised that while sexual transmission is unlikely, consistent condom use combined with HAART remains the most reliable means of prevention.<sup>2,45</sup> Further studies are needed to determine the source of HIV in cervicovaginal secretions, and factors that lead to shedding despite control of systemic replication.

### **Acknowledgments**

This study was supported by grant RO1 AI052065 (A.K.) from the National Institute of Allergy and Infectious Diseases. Data in this manuscript were collected by the Women's Interagency HIV Study (WIHS) Collaborative Study Group with centers (Principal Investigators) at New York City/Bronx Consortium (Kathryn Anastos); Brooklyn, NY (Howard Minkoff); Washington DC, Metropolitan Consortium (Mary Young); The Connie Wofsy Study Consortium of Northern California (Ruth Greenblatt); Los Angeles County/Southern California Consortium (Alexandra Levine); Chicago Consortium (Mardge Cohen); Data Coordinating Center (Stephen Gange). The WIHS is funded by the National Institute of Allergy and Infectious Diseases (U01-AI-35004, U01-AI-31834, U01-AI-34994, U01-AI-34989, U01-AI-34993, and U01-AI-42590) and by the *Eunice Kennedy Shriver* National Institute of Child Health and Human Development (U01-HD-32632). The study is co-funded by the National Cancer Institute, the National Institute on Drug Abuse, and the National Institute on Deafness and Other Communication Disorders. Funding is also provided by the National Center for Research Resources (UCSF-CTSI Grant Number UL1 RR024131). The contents of this publication

are solely the responsibility of the authors and do not necessarily represent the official views of the National Institutes of Health.

The Woman's Interagency HIV Study Protocol was reviewed and approved by the institutional review boards at each participating center, and written and informed consent was obtained from all patients. Human experimentation guidelines of the U.S. Department of Health and Human Services were followed in the conduct of this research.

#### **Author Disclosure Statement**

No competing financial interests exist.

#### Reference List

1. Joint United Nations Programme on HIV/AIDS (UNAIDS) and World Health Organization (WHO) 2009. AIDS Epidemic Update: December 2009. 11-30-2009.  
Ref Type: Report
2. Cohen MS, Chen YQ, McCauley M, Gamble T, Hosseinipour MC, Kumarasamy N, Hakim JG, Kumwenda J, Grinsztejn B, Pilotto JH, Godbole SV, Mehendale S, Chariyalertsak S, Santos BR, Mayer KH, Hoffman IF, Eshleman SH, Piwowar-Manning E, Wang L, Makhema J, Mills LA, de BG, Sanne I, Eron J, Gallant J, Havlir D, Swindells S, Ribaud H, Elharrar V, Burns D, Taha TE, Nielsen-Saines

- K, Celentano D, Essex M, Fleming TR. Prevention of HIV-1 Infection with Early Antiretroviral Therapy. *N Engl J Med* 2011.
3. Quinn TC, Wawer MJ, Sewankambo N, Serwadda D, Li C, Wabwire-Mangen F, Meehan MO, Lutalo T, Gray RH. Viral load and heterosexual transmission of human immunodeficiency virus type 1. Rakai Project Study Group. *N Engl J Med* 2000;342:921-29.
  4. John GC, Nduati RW, Mbori-Ngacha DA, Richardson BA, Panteleeff D, Mwatha A, Overbaugh J, Bwayo J, Ndinya-Achola JO, Kreiss JK. Correlates of mother-to-child human immunodeficiency virus type 1 (HIV-1) transmission: association with maternal plasma HIV-1 RNA load, genital HIV-1 DNA shedding, and breast infections. *J Infect Dis* 2001;183:206-12.
  5. Donnell D, Baeten JM, Kiarie J, Thomas KK, Stevens W, Cohen CR, McIntyre J, Lingappa JR, Celum C. Heterosexual HIV-1 transmission after initiation of antiretroviral therapy: a prospective cohort analysis. *Lancet* 2010;375:2092-98.
  6. Baeten JM, Kahle E, Lingappa JR, Coombs RW, any-Moretlwe S, Nakku-Joloba E, Mugo NR, Wald A, Corey L, Donnell D, Campbell MS, Mullins JI, Celum C. Genital HIV-1 RNA predicts risk of heterosexual HIV-1 transmission. *Sci Transl Med* 2011;3:77ra29.

7. Kovacs A, Wasserman SS, Burns D, Wright DJ, Cohn J, Landay A, Weber K, Cohen M, Levine A, Minkoff H, Miotti P, Palefsky J, Young M, Reichelderfer P. Determinants of HIV-1 shedding in the genital tract of women. *Lancet* 2001;358:1593-601.
8. Ghys PD, Fransen K, Diallo MO, Ettiegne-Traore V, Coulibaly IM, Yeboue KM, Kalish ML, Maurice C, Whitaker JP, Greenberg AE, Laga M. The associations between cervicovaginal HIV shedding, sexually transmitted diseases and immunosuppression in female sex workers in Abidjan, Cote d'Ivoire. *AIDS* 1997;11:F85-F93.
9. Kreiss J, Willerford DM, Hensel M, Emonyi W, Plummer F, Ndinya-Achola J, Roberts PL, Hoskyn J, Hillier S, Kiviat N. Association between cervical inflammation and cervical shedding of human immunodeficiency virus DNA. *J Infect Dis* 1994;170:1597-601.
10. Graham SM, Holte SE, Peshu NM, Richardson BA, Panteleeff DD, Jaoko WG, Ndinya-Achola JO, Mandaliya KN, Overbaugh JM, McClelland RS. Initiation of antiretroviral therapy leads to a rapid decline in cervical and vaginal HIV-1 shedding. *AIDS* 2007;21:501-7.
11. Fiore JR, Suligoi B, Saracino A, Di SM, Bugarini R, Lepera A, Favia A, Monno L, Angarano G, Pastore G. Correlates of HIV-1 shedding in cervicovaginal secretions and effects of antiretroviral therapies. *AIDS* 2003;17:2169-76.

12. Kemal KS, Foley B, Burger H, Anastos K, Minkoff H, Kitchen C, Philpott SM, Gao W, Robison E, Holman S, Dehner C, Beck S, Meyer WA, III, Landay A, Kovacs A, Bremer J, Weiser B. HIV-1 in genital tract and plasma of women: compartmentalization of viral sequences, coreceptor usage, and glycosylation. *Proc Natl Acad Sci U S A* 2003;100:12972-77.
13. Tirado G, Jove G, Kumar R, Noel RJ, Reyes E, Sepulveda G, Yamamura Y, Kumar A. Compartmentalization of drug resistance-associated mutations in a treatment-naive HIV-infected female. *AIDS Res Hum Retroviruses* 2004;20:684-86.
14. Delwart EL, Mullins JI, Gupta P, Learn GH, Jr., Holodniy M, Katzenstein D, Walker BD, Singh MK. Human immunodeficiency virus type 1 populations in blood and semen. *J Virol* 1998;72:617-23.
15. Petit CK. Human immunodeficiency virus type 1 compartmentalization in the central nervous system. *J Neurovirol* 2004;10 Suppl 1:21-24.
16. Smit TK, Brew BJ, Tourtellotte W, Morgello S, Gelman BB, Saksena NK. Independent evolution of human immunodeficiency virus (HIV) drug resistance mutations in diverse areas of the brain in HIV-infected patients, with and without dementia, on antiretroviral treatment. *J Virol* 2004;78:10133-48.
17. Ellerbrock TV, Lennox JL, Clancy KA, Schinazi RF, Wright TC, Pratt-Palmore M, Evans-Strickfaden T, Schnell C, Pai R, Conley LJ, Parrish-Kohler EE, Bush TJ,



- Tatti K, Hart CE. Cellular replication of human immunodeficiency virus type 1 occurs in vaginal secretions. *J Infect Dis* 2001;184:28-36.
18. Wright TC, Jr., Subbarao S, Ellerbrock TV, Lennox JL, Evans-Strickfaden T, Smith DG, Hart CE. Human immunodeficiency virus 1 expression in the female genital tract in association with cervical inflammation and ulceration. *Am J Obstet Gynecol* 2001;184:279-85.
  19. Sha BE, Zariffard MR, Wang QJ, Chen HY, Bremer J, Cohen MH, Spear GT. Female genital-tract HIV load correlates inversely with *Lactobacillus* species but positively with bacterial vaginosis and *Mycoplasma hominis*. *J Infect Dis* 2005;191:25-32.
  20. Tanton C, Weiss HA, Le GJ, Changalucha J, Rusizoka M, Baisley K, Everett D, Ross DA, Belec L, Hayes RJ, Watson-Jones D. Correlates of HIV-1 Genital Shedding in Tanzanian Women. *PLoS ONE* 2011;6:e17480.
  21. Spinillo A, Zara F, Gardella B, Preti E, Mainini R, Maserati R. The effect of vaginal candidiasis on the shedding of human immunodeficiency virus in cervicovaginal secretions. *Am J Obstet Gynecol* 2005;192:774-79.
  22. Legoff J, Weiss HA, Gresenguet G, Nzambi K, Frost E, Hayes RJ, Mabey DC, Malkin JE, Mayaud P, Belec L. Cervicovaginal HIV-1 and herpes simplex virus type 2 shedding during genital ulcer disease episodes. *AIDS* 2007;21:1569-78.

23. Al-Harthi L, Kovacs A, Coombs RW, Reichelderfer PS, Wright DJ, Cohen MH, Cohn J, Cu-Uvin S, Watts H, Lewis S, Beckner S, Landay A. A menstrual cycle pattern for cytokine levels exists in HIV-positive women: implication for HIV vaginal and plasma shedding. *AIDS* 2001;15:1535-43.
24. Reichelderfer PS, Coombs RW, Wright DJ, Cohn J, Burns DN, Cu-Uvin S, Baron PA, Coheng MH, Landay AL, Beckner SK, Lewis SR, Kovacs AA. Effect of menstrual cycle on HIV-1 levels in the peripheral blood and genital tract. WHS 001 Study Team. *AIDS* 2000;14:2101-7.
25. Heffron R, Donnell D, Rees H, Celum C, Mugo N, Were E, de BG, Nakku-Joloba E, Ngunjiri K, Kiarie J, Coombs RW, Baeten JM. Use of hormonal contraceptives and risk of HIV-1 transmission: a prospective cohort study. *Lancet Infect Dis* 2011.
26. Cu-Uvin S, Caliendo AM, Reinert S, Chang A, Juliano-Remollino C, Flanigan TP, Mayer KH, Carpenter CC. Effect of highly active antiretroviral therapy on cervicovaginal HIV-1 RNA. *AIDS* 2000;14:415-21.
27. Neely MN, Benning L, Xu J, Strickler HD, Greenblatt RM, Minkoff H, Young M, Bremer J, Levine AM, Kovacs A. Cervical shedding of HIV-1 RNA among women with low levels of viremia while receiving highly active antiretroviral therapy. *J Acquir Immune Defic Syndr* 2007;44:38-42.

28. Cu-Uvin S, DeLong AK, Venkatesh KK, Hogan JW, Ingersoll J, Kurpewski J, De Pasquale MP, D'Aquila R, Caliendo AM. Genital tract HIV-1 RNA shedding among women with below detectable plasma viral load. *AIDS* 2010;24:2489-97.
29. Kwara A, DeLong A, Rezk N, Hogan J, Burtwell H, Chapman S, Moreira CC, Kurpewski J, Ingersoll J, Caliendo AM, Kashuba A, Cu-Uvin S. Antiretroviral drug concentrations and HIV RNA in the genital tract of HIV-infected women receiving long-term highly active antiretroviral therapy. *Clin Infect Dis* 2008;46:719-25.
30. Coombs RW, Wright DJ, Reichelderfer PS, Burns DN, Cohn J, Cu-Uvin S, Baron PA, Cohen MH, Landay AL, Lewis S, Kovacs A. Variation of human immunodeficiency virus type 1 viral RNA levels in the female genital tract: implications for applying measurements to individual women. *J Infect Dis* 2001;184:1187-91.
31. Villanueva JM, Ellerbrock TV, Lennox JL, Bush TJ, Wright TC, Pratt-Palmore M, Evans-Strickfaden T, Conley LJ, Schnell C, Hart CE. The menstrual cycle does not affect human immunodeficiency virus type 1 levels in vaginal secretions. *J Infect Dis* 2002;185:170-177.
32. Barkan SE, Melnick SL, Preston-Martin S, Weber K, Kalish LA, Miotti P, Young M, Greenblatt R, Sacks H, Feldman J. The Women's Interagency HIV Study. WIHS Collaborative Study Group. *Epidemiology* 1998;9:117-25.

33. Landay A, Benning L, Bremer J, Weiser B, Burger H, Nowicki M, Kovacs A. Correlates of immune activation marker changes in human immunodeficiency virus (HIV)-seropositive and high-risk HIV-seronegative women who use illicit drugs. *J Infect Dis* 2003;188:209-18.
34. Operskalski EA, Mack WJ, Strickler HD, French AL, Augenbraun M, Tien PC, Villacres MC, Spencer LY, Degiacomo M, Kovacs A. Factors associated with hepatitis C viremia in a large cohort of HIV-infected and -uninfected women. *J Clin Virol* 2008;41:255-63.
35. Nugent RP, Krohn MA, Hillier SL. Reliability of diagnosing bacterial vaginosis is improved by a standardized method of gram stain interpretation. *J Clin Microbiol* 1991;29:297-301.
36. Palefsky JM, Minkoff H, Kalish LA, Levine A, Sacks HS, Garcia P, Young M, Melnick S, Miotti P, Burk R. Cervicovaginal human papillomavirus infection in human immunodeficiency virus-1 (HIV)-positive and high-risk HIV-negative women. *J Natl Cancer Inst* 1999;91:226-36.
37. DHHS Panel on Antiretroviral Guidelines for Adults and Adolescents. Panel on Antiretroviral Guidelines for Adults and Adolescents. Guidelines for the use of antiretroviral agents in HIV-1-infected adults and adolescents. October 2008 revision. *AIDSInfo* , 1-139. 11-3-2008. 3-18-2011.

Ref Type: Electronic Citation

38. Cu-Uvin S, Snyder B, Harwell JI, Hogan J, Chibwasha C, Hanley D, Ingersoll J, Kurpewski J, Mayer KH, Caliendo AM. Association between paired plasma and cervicovaginal lavage fluid HIV-1 RNA levels during 36 months. *J Acquir Immune Defic Syndr* 2006;42:584-87.
39. Lawn SD, Subbarao S, Wright TC, Jr., Evans-Strickfaden T, Ellerbrock TV, Lennox JL, Butera ST, Hart CE. Correlation between human immunodeficiency virus type 1 RNA levels in the female genital tract and immune activation associated with ulceration of the cervix. *J Infect Dis* 2000;181:1950-1956.
40. Kissinger P, Amedee A, Clark RA, Dumestre J, Theall KP, Myers L, Hagensee ME, Farley TA, Martin DH. *Trichomonas vaginalis* treatment reduces vaginal HIV-1 shedding. *Sex Transm Dis* 2009;36:11-16.
41. Theall KP, Amedee A, Clark RA, Dumestre J, Kissinger P. Alcohol consumption and HIV-1 vaginal RNA shedding among women. *J Stud Alcohol Drugs* 2008;69:454-58.
42. Poonia B, Nelson S, Bagby GJ, Zhang P, Quniton L, Veazey RS. Chronic alcohol consumption results in higher simian immunodeficiency virus replication in mucosally inoculated rhesus macaques. *AIDS Res Hum Retroviruses* 2006;22:589-94.

43. Bagasra O, Whittle P, Kajdacsy-Balla A, Lischner HW. Effects of alcohol ingestion on in vitro susceptibility of peripheral blood mononuclear cells to infection with HIV-1 and on CD4 and CD8 lymphocytes. *Prog Clin Biol Res* 1990;325:351-58.
44. Nagot N, Ouedraogo A, Konate I, Weiss HA, Foulongne V, Defer MC, Sanon A, Becquart P, Segondy M, Sawadogo A, Van de PP, Mayaud P. Roles of clinical and subclinical reactivated herpes simplex virus type 2 infection and human immunodeficiency virus type 1 (HIV-1)-induced immunosuppression on genital and plasma HIV-1 levels. *J Infect Dis* 2008;198:241-49.
45. Vernazza P, Hirschel B, Bernasconi E, Flepp M. Les personnes séropositives ne souffrant d'aucune autre MST et suivant un traitement antirétroviral efficace ne transmettent pas le VIH par voie sexuelle. *Bulletin des Médecins Suisses* 2008;89:165-69.

**Table 1. Demographic and Clinical Characteristics of Study Population at Baseline Visit (N=481).**

| Characteristic                                 | No. of participants | No. (%) <sup>a</sup> | Median (IQR)           |
|------------------------------------------------|---------------------|----------------------|------------------------|
| Age, years                                     | 481                 |                      | 36.3 (31.7-41.5)       |
| <35                                            |                     | 204 (42.4)           |                        |
| 35-40                                          |                     | 150 (31.2)           |                        |
| 41+                                            |                     | 127 (26.4)           |                        |
| Self-identified ethnicity                      | 481                 |                      |                        |
| White (Non-Hispanic)                           |                     | 60 (12.5)            |                        |
| African-American (Non-Hispanic)                |                     | 252 (52.4)           |                        |
| Hispanic                                       |                     | 159 (33.1)           |                        |
| Other                                          |                     | 10 (2.1)             |                        |
| HIV exposure category                          | 477                 |                      |                        |
| Intravenous drug use                           |                     | 174 (36.5)           |                        |
| Heterosexual contact                           |                     | 212 (44.4)           |                        |
| Transfusion                                    |                     | 6 (1.3)              |                        |
| Not identified                                 |                     | 85 (17.8)            |                        |
| Antiretroviral therapy                         | 480                 |                      |                        |
| None                                           |                     | 178 (37.1)           |                        |
| Monotherapy                                    |                     | 178 (37.1)           |                        |
| Combination therapy                            |                     | 122 (25.4)           |                        |
| HAART                                          |                     | 2 (0.4)              |                        |
| Plasma HIV-1 RNA level, copies/mL              | 473                 |                      | 16,000 (≤4,000-68,000) |
| ≤4,000                                         |                     | 140 (29.6)           |                        |
| 4,001-9,999                                    |                     | 56 (11.8)            |                        |
| 10,000-39,999                                  |                     | 97 (20.5)            |                        |
| 40,000-99,999                                  |                     | 98 (20.7)            |                        |
| ≥100,000                                       |                     | 82 (17.3)            |                        |
| CD4 cell count, cells/mm <sup>3</sup>          | 466                 |                      | 339 (203-512)          |
| ≤200                                           |                     | 115 (24.7)           |                        |
| 201-350                                        |                     | 133 (28.5)           |                        |
| 351-500                                        |                     | 99 (21.2)            |                        |
| >500                                           |                     | 119 (25.5)           |                        |
| Alcohol consumption                            | 471                 |                      |                        |
| None                                           |                     | 201 (42.7)           |                        |
| Light (<3 drinks/week)                         |                     | 146 (31.0)           |                        |
| Moderate (3-13 drinks/week)                    |                     | 72 (15.3)            |                        |
| Heavy (14 or more drinks/week)                 |                     | 52 (11.0)            |                        |
| Injected drugs in past 6 mo                    | 480                 | 63 (13.1)            |                        |
| Number of lifetime male sex partners           | 479                 |                      | 15 (5-50)              |
| 0-6                                            |                     | 156 (32.6)           |                        |
| 7-29                                           |                     | 151 (31.5)           |                        |
| 30+                                            |                     | 172 (35.9)           |                        |
| Number of male sex partners in past 6 mo       | 481                 |                      | 1 (0-1)                |
| 0                                              |                     | 147 (30.6)           |                        |
| 1                                              |                     | 262 (54.5)           |                        |
| 2 or more                                      |                     | 72 (15.0)            |                        |
| Bacterial vaginosis Gram stain                 | 471                 |                      |                        |
| Normal (0-3)                                   |                     | 169 (35.9)           |                        |
| Intermediate (4-6)                             |                     | 80 (17.0)            |                        |
| Consistent (7-10)                              |                     | 222 (47.1)           |                        |
| Candidiasis                                    | 468                 | 44 (9.4)             |                        |
| Hepatitis C                                    | 471                 |                      |                        |
| AB-negative                                    |                     | 275 (58.4)           |                        |
| AB-positive RNA-negative                       |                     | 34 (7.2)             |                        |
| AB-positive RNA-positive                       |                     | 162 (34.4)           |                        |
| Herpes simplex virus, type 1                   | 465                 | 387 (83.2)           |                        |
| Herpes simplex virus, type 2                   | 464                 | 357 (76.9)           |                        |
| Human papillomavirus, all types                | 203                 | 107 (52.7)           |                        |
| Human papillomavirus, types 16, 18, 31, 33, 35 | 203                 | 30 (14.8)            |                        |
| Trichomonas vaginalis                          | 468                 | 55 (11.8)            |                        |
| Syphilis (+ RPR)                               | 478                 | 82 (17.2)            |                        |

**NOTE.** AB, antibody; HAART, highly active antiretroviral therapy; IQR, interquartile range.

<sup>a</sup> Percentages exclude unknown results and may not add up to 100% due to rounding.

**Table 2. Clinical Characteristics of Study Population by Plasma Viral Load Assay LLD and Cervicovaginal Inflammation (ISV) (N person-visits=959).<sup>a</sup>**

| PVL                   | CV-VL | N               | ISV <sup>c</sup> |     | PVL                     | CV-VL               | Antiretroviral therapy |           |           |
|-----------------------|-------|-----------------|------------------|-----|-------------------------|---------------------|------------------------|-----------|-----------|
|                       |       |                 | 0                | 1   | Median (range)          | Median (range)      | None                   | Non-HAART | HAART     |
| <i>PVL LLD = 4000</i> |       |                 |                  |     |                         |                     |                        |           |           |
| <4000                 | <80   | 9               | 2                | 7   | N/A                     | N/A                 | 5 (55%)                | 4 (44%)   | 0         |
| <4000                 | ≥80   | 1               | 0                | 1   | N/A                     | 1,300               | 1 (100%)               | 0         | 0         |
|                       |       |                 | P-value**:       |     | 1.00                    |                     |                        |           |           |
| ≥4000                 | <80   | 90 <sup>b</sup> | 14               | 76  | 47000 (4,200-2,100,000) | N/A                 | 25 (28%)               | 64 (72%)  | 0         |
| ≥4000                 | ≥80   | 111             | 17               | 94  | 59000 (4,600-4,900,000) | 3100 (80-660,000)   | 27 (24%)               | 83 (75%)  | 1 (1%)    |
|                       |       |                 | P-value**:       |     | 1.00                    |                     |                        |           |           |
|                       | Total | 211             |                  |     |                         |                     | 58 (28%)               | 151 (72%) | 1 (0.5%)  |
| <i>PVL LLD = 400</i>  |       |                 |                  |     |                         |                     |                        |           |           |
| <400                  | <80   | 23              | 7                | 16  | N/A                     | N/A                 | 3 (13%)                | 4 (17%)   | 16 (70%)  |
| <400                  | ≥80   | 1               | 1                | 0   | N/A                     | 5,400               | 1 (100%)               | 0         | 0         |
|                       |       |                 | P-value**:       |     | 0.33                    |                     |                        |           |           |
| ≥400                  | <80   | 45              | 11               | 34  | 8600 (500-290,000)      | N/A                 | 13 (29%)               | 11 (24%)  | 21 (47%)  |
| ≥400                  | ≥80   | 32              | 3                | 29  | 24500 (590-1,900,000)   | 1900 (83-290,000)   | 15 (47%)               | 8 (25%)   | 9 (28%)   |
|                       |       |                 | P-value**:       |     | 0.14                    |                     |                        |           |           |
|                       | Total | 101             |                  |     |                         |                     | 32 (32%)               | 23 (23%)  | 46 (45%)  |
| <i>PVL LLD = 80</i>   |       |                 |                  |     |                         |                     |                        |           |           |
| <80                   | <80   | 164             | 50               | 114 | N/A                     | N/A                 | 20 (12%)               | 16 (10%)  | 128(78%)  |
| <80                   | ≥80   | 13              | 5                | 8   | N/A                     | 1100 (100-6,300)    | 5 (38%)                | 2 (15%)   | 6(47%)    |
|                       |       |                 | P-value**:       |     | 0.55                    |                     |                        |           |           |
| ≥80                   | <80   | 301*            | 87               | 213 | 3100 (82-590,000)       | N/A                 | 115 (38%)              | 65 (22%)  | 121(40%)  |
| ≥80                   | ≥80   | 169             | 28               | 141 | 13000 (81-4,600,000)    | 1100 (82-270,000)   | 81 (48%)               | 34 (20%)  | 54(32%)   |
|                       |       |                 | P-value**:       |     | 0.003                   |                     |                        |           |           |
|                       | Total | 647             |                  |     |                         |                     | 221 (34%)              | 117 (18%) | 309(48%)  |
| <i>All visits</i>     |       |                 |                  |     |                         |                     |                        |           |           |
| UD                    | <80   | 196             | 59               | 137 | N/A                     | N/A                 | 28 (14%)               | 24 (12%)  | 144 (74%) |
| UD                    | ≥80   | 15              | 6                | 9   | N/A                     | 1,300 (100-6,300)   | 7 (47%)                | 2 (13%)   | 6 (40%)   |
| D                     | <80   | 436*            | 112              | 323 | 5,650 (82-2,100,000)    | N/A                 | 153 (35%)              | 140 (32%) | 142 (33%) |
| D                     | ≥80   | 312             | 48               | 264 | 29,000 (81-4,900,000)   | 14,000 (80-660,000) | 123 (39%)              | 125 (40%) | 64 (21%)  |
|                       | Total | 959             | 225              | 733 |                         |                     | 311 (32%)              | 291 (30%) | 356 (38%) |

PVL=plasma viral load; CV-VL=cervicovaginal viral load; HAART=highly active antiretroviral therapy; LLD=lower limit of detection; UD=undetectable; D=detectable.

<sup>a</sup> HIV viral load is unknown for 17 person-visits which are excluded from this table.

<sup>b</sup> Antiretroviral therapy is unknown for one subject.

<sup>c</sup> ISV=inflammation summary variable: value is 1 if any of the following is present at person-visit; inflammation-associated cellular changes, cervical ectopy, exudate, friability, lesions, vaginal pH >5.5, intermediate BV (Nugent) score, consistent BV score, or trichomoniasis, 0 if none is present.

\*ISV is unknown for one visit for PVL LLD=80, PVL ≥80, CV-VL<80 and for all visits PVL = D, CV-VL<80

\*\*Fisher's exact tests are used to test associations between ISV and CV-VL for different levels of PVL (detectable, undetectable) in LLD categories.



**Table 3. Association of Demographic, Behavioral, Virologic, and Clinical Factors with HIV-1 RNA Level (log<sub>10</sub> copies/mL) in CVL Among 481 Participants Across 976 Visits.**

| Factor <sup>a</sup>                      | Mean SE)    | Univariate models <sup>b</sup> |                              | Multivariate model excluding summary inflammation <sup>c</sup> |                              | Multivariate model including summary inflammation <sup>d</sup> |                              |
|------------------------------------------|-------------|--------------------------------|------------------------------|----------------------------------------------------------------|------------------------------|----------------------------------------------------------------|------------------------------|
|                                          |             | β (SE)                         | P                            | β (SE)                                                         | P                            | β (SE)                                                         | P                            |
| Self-identified ethnicity                |             |                                |                              |                                                                |                              |                                                                |                              |
| White (non-Hispanic)                     | 2.08 (0.09) | Ref                            |                              | -                                                              | -                            |                                                                |                              |
| African-American (non-Hispanic)          | 2.23 (0.05) | 0.15 (0.10)                    | 0.15                         | -                                                              | -                            |                                                                |                              |
| Hispanic                                 | 2.32 (0.08) | <b>0.24 (0.12)</b>             | <b>0.04</b>                  | -                                                              | -                            |                                                                |                              |
| Other                                    | 2.08 (0.18) | -0.002 (0.20)                  | 0.99                         | -                                                              | -                            |                                                                |                              |
| Antiretroviral therapy                   |             |                                |                              |                                                                |                              |                                                                |                              |
| No therapy                               | 2.28 (0.06) | Ref                            |                              | Ref                                                            |                              | Ref                                                            |                              |
| Monotherapy                              | 2.42 (0.10) | 0.13 (0.11)                    | 0.23                         | 0.03 (0.11)                                                    | 0.78                         | 0.03 (0.11)                                                    | 0.79                         |
| Combination therapy                      | 2.46 (0.09) | 0.18 (0.10)                    | 0.09                         | 0.08 (0.10)                                                    | 0.43                         | 0.09 (0.09)                                                    | 0.33                         |
| HAART                                    | 1.90 (0.04) | <b>-0.38 (0.07)</b>            | <b>&lt;0.001</b>             | <b>-0.17 (0.07)</b>                                            | <b>0.01</b>                  | <b>-0.19 (0.07)</b>                                            | <b>0.005</b>                 |
| Plasma HIV-1 RNA, copies/mL (PVL)        |             |                                |                              |                                                                |                              |                                                                |                              |
| ≤4,000                                   | 1.83 (0.03) | Ref                            |                              | Ref                                                            |                              | Ref                                                            |                              |
| 4,001-9,999                              | 2.09 (0.08) | <b>0.26 (0.09)</b>             | <b>0.003</b>                 | <b>0.27 (0.09)</b>                                             | <b>0.002</b>                 | <b>0.22 (0.08)</b>                                             | <b>0.01</b>                  |
| 10,000-39,999                            | 2.38 (0.08) | <b>0.55 (0.09)</b>             | <b>&lt;0.001</b>             | <b>0.47 (0.09)</b>                                             | <b>&lt;0.001</b>             | <b>0.47 (0.09)</b>                                             | <b>&lt;0.001</b>             |
| 40,000-99,999                            | 2.60 (0.10) | <b>0.77 (0.11)</b>             | <b>&lt;0.001</b>             | <b>0.74 (0.11)</b>                                             | <b>&lt;0.001</b>             | <b>0.68 (0.11)</b>                                             | <b>&lt;0.001</b>             |
| ≥100,000                                 | 3.02 (0.12) | <b>1.19 (0.12)</b>             | <b>&lt;0.001<sup>d</sup></b> | <b>1.09 (0.14)</b>                                             | <b>&lt;0.001<sup>d</sup></b> | <b>1.09 (0.13)</b>                                             | <b>&lt;0.001<sup>d</sup></b> |
| Per log <sub>10</sub> increase           |             | <b>0.55 (0.04)</b>             | <b>&lt;0.001</b>             | <b>0.50 (0.05)</b>                                             | <b>&lt;0.001</b>             | <b>0.50 (0.05)</b>                                             | <b>&lt;0.001</b>             |
| CD4 cell count, cells/mm <sup>3</sup>    |             |                                |                              |                                                                |                              |                                                                |                              |
| 0-200                                    | 2.50 (0.09) | <b>0.52 (0.10)</b>             | <b>&lt;0.001<sup>d</sup></b> | -                                                              | -                            |                                                                |                              |
| 201-350                                  | 2.32 (0.07) | <b>0.34 (0.09)</b>             | <b>&lt;0.001</b>             | -                                                              | -                            |                                                                |                              |
| 351-500                                  | 2.11 (0.06) | 0.13 (0.07)                    | 0.07                         | -                                                              | -                            |                                                                |                              |
| >500                                     | 1.98 (0.05) | Ref                            |                              | -                                                              | -                            |                                                                |                              |
| Hepatitis C status                       |             |                                |                              |                                                                |                              |                                                                |                              |
| AB-negative                              | 2.26 (0.05) | Ref                            |                              | -                                                              | -                            |                                                                |                              |
| AB-positive RNA-negative                 | 2.06 (0.12) | -0.19 (0.13)                   | 0.14                         | -                                                              | -                            |                                                                |                              |
| AB-positive RNA-positive                 | 2.21 (0.07) | -0.05 (0.09)                   | 0.54                         | -                                                              | -                            |                                                                |                              |
| Vaginal pH                               |             |                                |                              |                                                                |                              |                                                                |                              |
| <4.5                                     | 2.13 (0.06) | Ref                            |                              | -                                                              | -                            |                                                                |                              |
| 4.5-5.4                                  | 2.18 (0.05) | 0.05 (0.07)                    | 0.51                         | -                                                              | -                            |                                                                |                              |
| 5.5+                                     | 2.34 (0.06) | <b>0.21 (0.08)</b>             | <b>0.01<sup>e</sup></b>      | -                                                              | -                            |                                                                |                              |
| Squamous metaplasia                      | 2.26 (0.05) | 0.10 (0.06)                    | 0.10                         | -                                                              | -                            |                                                                |                              |
| Inflammation                             | 2.36 (0.13) | 0.16 (0.13)                    | 0.22                         | -                                                              | -                            |                                                                |                              |
| Inflammation-associated cellular changes | 2.62 (0.17) | <b>0.42 (0.17)</b>             | <b>0.01</b>                  | <b>0.38 (0.17)</b>                                             | <b>0.03</b>                  |                                                                |                              |
| Cervical friability                      | 2.56 (0.10) | <b>0.37 (0.11)</b>             | <b>0.001</b>                 |                                                                |                              |                                                                |                              |
| Cervical ectopy                          | 2.92 (0.21) | <b>0.71 (0.21)</b>             | <b>0.001</b>                 | <b>0.48 (0.18)</b>                                             | <b>0.009</b>                 |                                                                |                              |
| Cervical exudate                         | 2.39 (0.07) | <b>0.20 (0.07)</b>             | <b>0.007</b>                 | <b>0.18 (0.06)</b>                                             | <b>0.005</b>                 |                                                                |                              |
| Cervical lesions                         | 2.58 (0.14) | <b>0.37 (0.15)</b>             | <b>0.01</b>                  | -                                                              | -                            |                                                                |                              |
| Herpes simplex virus, type 1             | 2.27 (0.04) | <b>0.21 (0.09)</b>             | <b>0.02</b>                  | -                                                              | -                            |                                                                |                              |
| BV Gram stain score                      |             |                                |                              |                                                                |                              |                                                                |                              |
| Normal (0-3)                             | 2.12 (0.05) | Ref                            |                              | -                                                              | -                            |                                                                |                              |
| Intermediate (4-6)                       | 2.30 (0.07) | <b>0.18 (0.08)</b>             | <b>0.03</b>                  | -                                                              | -                            |                                                                |                              |
| Consistent (7-10)                        | 2.31 (0.06) | <b>0.19 (0.08)</b>             | <b>0.01<sup>f</sup></b>      | -                                                              | -                            |                                                                |                              |
| Trichomonas vaginalis                    | 2.52 (0.14) | <b>0.33 (0.15)</b>             | <b>0.02</b>                  | <b>0.31 (0.14)</b>                                             | <b>0.03</b>                  |                                                                |                              |
| inflammation Summary Variable (ISV)      | 2.29 (0.04) | <b>0.29 (0.06)</b>             | <b>&lt;0.001</b>             |                                                                |                              | <b>0.16 (0.06)<sup>h</sup></b>                                 | <b>0.004<sup>h</sup></b>     |

**NOTE.** Boldface type indicates statistical significance. ART, antiretroviral therapy; BV, bacterial vaginosis; HAART, highly active antiretroviral therapy; Ref, reference; SE, standard error.

<sup>a</sup> All factors were evaluated but only those with associations where P<0.10 are included in the table.

<sup>b</sup> Linear regression with generalized estimating equations assuming an exchangeable correlation matrix and identity link is used to estimate β-coefficients, standard errors and P values.

<sup>c</sup> The multivariate model includes all evaluated factors where P<0.10 in the univariate model (excluding summary inflammation) that remained P<0.10 in the multivariate model. Estimates are displayed for all variables that were included in the model. 857 observations are included in the multivariate model.

<sup>d</sup> P-trend<0.001; <sup>e</sup> P-trend<0.01; <sup>f</sup> P-trend<0.05.

<sup>g</sup> The multivariate model includes all factors in the table (except those inflammatory variables that are used to define the summary inflammation) where P<0.10 in the univariate model that remained P<0.10 in the multivariate model. Estimates are displayed for all variables that remained in the model. 957 observations are included in the multivariate model.

<sup>h</sup> There was significant interaction between ISV and PVL in correlation with CV-VL with correlation coefficient 0.26. Using Generalized Estimating Equation the following equation was derived:  $Y = 0.7 + 0.33X_1 - 0.79X_2 + 0.26X_1 * X_2$  where  $Y = \log_{10}$  CV-VL,  $X_1 = \log_{10}$  HIV RNA,  $X_2 = \text{ISV}$  ( $P = 0.006$ )

Table 4

Table 4 STRATA. Association of Factors with HIV-1 RNA Level (log<sub>10</sub> copies/mL) in CVLAt individual patient visits, stratified by Plasma HIV-RNA( PVL), Univariate and Multivariate analyses.

| Factor <sup>a</sup>                   | Plasma HIV-1 RNA < 80 copies/mL |            |                         |              | Plasma HIV-1 RNA ≥ 80 copies/mL |                     |                              |                     | PVL<80 (N=132)            |                    | PVL ≥80 (N=665)              |              |
|---------------------------------------|---------------------------------|------------|-------------------------|--------------|---------------------------------|---------------------|------------------------------|---------------------|---------------------------|--------------------|------------------------------|--------------|
|                                       | No.                             | No. (%)    | Univariate <sup>b</sup> |              | No.                             | No. (%)             | Univariate <sup>b</sup>      |                     | Multivariate <sup>c</sup> |                    | Multivariate <sup>c</sup>    |              |
|                                       |                                 |            | β (SE)                  | P            |                                 |                     | β (SE)                       | P                   | β (SE)                    | P                  | β (SE)                       | P            |
| Antiretroviral therapy                | 177                             |            |                         |              | 747                             |                     |                              |                     |                           |                    |                              |              |
| No therapy                            |                                 | 25 (14.1)  | Ref                     |              | 276 (14.1)                      | Ref                 |                              | Ref                 |                           | -                  | -                            |              |
| Monotherapy                           |                                 | 8 (4.5)    | <b>-0.36 (0.16)</b>     | <b>0.02</b>  | 123 (16.5)                      | 0.19 (0.12)         | 0.12                         | <b>-0.52(0.20)</b>  | <b>0.009</b>              | -                  | -                            |              |
| Combination therapy                   |                                 | 10 (5.7)   | -0.05 (0.26)            | 0.85         | 142 (19.0)                      | 0.20 (0.11)         | 0.07                         | -0.004 (0.37)       | 0.99                      | -                  | -                            |              |
| HAART                                 |                                 | 134 (75.7) | <b>-0.32 (0.16)</b>     | <b>0.04</b>  | 206 (27.6)                      | <b>-0.25 (0.09)</b> | <b>0.004</b>                 | <b>-0.39 (0.19)</b> | <b>0.04</b>               | -                  | -                            |              |
| Plasma HIV-1 RNA level                |                                 |            |                         |              | 748                             |                     |                              |                     |                           |                    |                              |              |
| 80-4000 copies/mL                     |                                 |            | -                       | -            | 239 (32.0)                      | Ref                 |                              | -                   | -                         | Ref                |                              |              |
| 4,001-9,999                           |                                 |            | -                       | -            | 122 (16.3)                      | 0.17 (0.09)         | 0.08                         | -                   | -                         | <b>0.22 (0.10)</b> | <b>0.03</b>                  |              |
| 10,000-39,999                         |                                 |            | -                       | -            | 161 (21.5)                      | <b>0.45 (0.09)</b>  | <b>&lt;0.001</b>             | -                   | -                         | <b>0.40 (0.10)</b> | <b>&lt;0.001</b>             |              |
| 40,000-99,999                         |                                 |            | -                       | -            | 118 (15.8)                      | <b>0.67 (0.11)</b>  | <b>&lt;0.001</b>             | -                   | -                         | <b>0.71 (0.11)</b> | <b>&lt;0.001</b>             |              |
| ≥100,000                              |                                 |            | -                       | -            | 108 (14.4)                      | <b>1.08 (0.13)</b>  | <b>&lt;0.001<sup>d</sup></b> | -                   | -                         | <b>1.02 (0.14)</b> | <b>&lt;0.001<sup>d</sup></b> |              |
| Per log <sub>10</sub> increase        |                                 |            | -                       | -            |                                 | <b>0.50 (0.05)</b>  | <b>&lt;0.001</b>             |                     |                           | <b>0.48 (0.05)</b> | <b>&lt;0.001</b>             |              |
| CD4 cell count, cells/mm <sup>3</sup> | 174                             |            |                         |              | 728                             |                     |                              |                     |                           |                    |                              |              |
| <200                                  |                                 | 8 (4.6)    | <b>-0.11 (0.04)</b>     | <b>0.01</b>  | 201 (27.6)                      | <b>0.40 (0.12)</b>  | <b>0.001</b>                 |                     |                           |                    |                              |              |
| 201-350                               |                                 | 29 (16.7)  | -0.04 (0.07)            | 0.54         | 205 (28.2)                      | <b>0.32 (0.11)</b>  | <b>0.004</b>                 |                     |                           |                    |                              |              |
| 351-500                               |                                 | 39 (22.4)  | -0.002 (0.07)           | 0.98         | 154 (21.2)                      | 0.11 (0.09)         | 0.25                         |                     |                           |                    |                              |              |
| >500                                  |                                 | 98 (56.3)  | Ref                     |              | 168 (23.1)                      | Ref                 |                              |                     |                           |                    |                              |              |
| Vaginal pH                            | 176                             |            |                         |              | 736                             |                     |                              |                     |                           |                    |                              |              |
| <4.5                                  |                                 | 65 (36.9)  | Ref                     |              | 192 (26.1)                      | Ref                 |                              |                     |                           |                    |                              |              |
| 4.5-5.4                               |                                 | 71 (40.3)  | -0.004 (0.06)           | 0.95         | 279 (37.9)                      | 0.05 (0.09)         | 0.6                          |                     |                           |                    |                              |              |
| 5.5+                                  |                                 | 40 (22.7)  | 0.08 (0.08)             | 0.32         | 265 (36.0)                      | 0.18 (0.10)         | 0.09                         |                     |                           |                    |                              |              |
| Squamous metaplasia                   | 176                             | 98 (55.7)  | 0.0008 (0.06)           | 0.99         | 734                             | 484 (65.9)          | 0.10 (0.08)                  | 0.2                 |                           |                    |                              |              |
| Inflammation                          | 176                             | 10 (5.7)   | 0.34 (0.21)             | 0.12         | 734                             | 55 (7.5)            | 0.17 (0.16)                  | 0.29                |                           |                    |                              |              |
| Inflammation changes                  | 176                             | 8 (4.6)    | 0.01 (0.11)             | 0.91         | 734                             | 32 (4.4)            | <b>0.61 (0.21)</b>           | <b>0.004</b>        | -                         | -                  | <b>0.61 (0.22)</b>           | <b>0.007</b> |
| Cervical friability                   | 161                             | 21 (13.0)  | -0.009 (0.09)           | 0.91         | 676                             | 103 (15.2)          | <b>0.40 (0.12)</b>           | <b>0.001</b>        | -                         | -                  | <b>0.23 (0.12)</b>           | <b>0.05</b>  |
| Cervical ectopy                       | 161                             | 1 (0.6)    | -                       | -            | 675                             | 36 (5.3)            | <b>0.60 (0.22)</b>           | <b>0.005</b>        | -                         | -                  | <b>0.46 (0.20)</b>           | <b>0.02</b>  |
| Cervical exudate                      | 161                             | 53 (32.9)  | 0.002 (0.06)            | 0.98         | 678                             | 222 (32.7)          | <b>0.27 (0.09)</b>           | <b>0.002</b>        | -                         | -                  | <b>0.25 (0.08)</b>           | <b>0.001</b> |
| Cervical lesions                      | 158                             | 6 (3.8)    | <b>-0.12 (0.03)</b>     | <b>0.001</b> | 656                             | 59 (9.0)            | <b>0.39 (0.17)</b>           | <b>0.02</b>         | <b>-0.16 (0.06)</b>       | <b>0.01</b>        | -                            | -            |
| Herpes simplex virus, type 1          | 166                             | 115 (69.3) | -0.03 (0.07)            | 0.71         | 733                             | 608 (83.0)          | 0.17 (0.11)                  | 0.13                |                           |                    | -                            | -            |
| Herpes simplex virus, type 2          | 165                             | 110 (66.7) | <b>0.13 (0.05)</b>      | <b>0.01</b>  | 729                             | 563 (77.2)          | 0.07 (0.11)                  | 0.52                | <b>0.11 (0.06)</b>        | <b>0.09</b>        | -                            | -            |
| BV Gram stain score                   | 159                             |            |                         |              | 707                             |                     |                              |                     |                           |                    |                              |              |
| Normal (0-3)                          |                                 | 88 (55.4)  | Ref                     |              | 270 (38.2)                      | Ref                 |                              | Ref                 |                           | -                  | -                            |              |
| Intermediate (4-6)                    |                                 | 38 (23.9)  | -0.11 (0.07)            | 0.11         | 139 (19.7)                      | <b>0.26 (0.10)</b>  | <b>0.01</b>                  | -0.11 (0.08)        | 0.13                      | -                  | -                            |              |
| Consistent (7-10)                     |                                 | 33 (20.8)  | <b>-0.14 (0.06)</b>     | <b>0.02</b>  | 298 (42.2)                      | <b>0.18 (0.09)</b>  | <b>0.05</b>                  | <b>-0.19 (0.08)</b> | <b>0.02</b>               | -                  | -                            |              |
| Trichomonas vaginalis                 | 176                             | 6 (3.4)    | 0.16 (0.24)             | 0.49         | 734                             | 66 (9.0)            | 0.30 (0.16)                  | 0.06                | -                         | -                  | <b>0.33 (0.16)</b>           | <b>0.04</b>  |
| Summary inflammation                  | 177                             | 122 (68.9) | -0.09 (0.08)            | 0.23         | 747                             | 587 (78.6)          | <b>0.37 (0.07)</b>           | <b>&lt;0.001</b>    |                           |                    |                              |              |

NOTE. Boldface type indicates statistical significance. ART, antiretroviral therapy; BV, bacterial vaginosis; HAART, highly active antiretroviral therapy; Ref, reference; SE, standard error.

<sup>a</sup> All factors evaluated but only those with associations where P<0.10 are included in multivariate analysis.

<sup>b</sup> Linear regression with generalized estimating equations assuming an exchangeable correlation matrix and identity link is used to estimate β-coefficients, standard errors and P values.

<sup>c</sup> The multivariate models include all evaluated factors where P<0.10 in the univariate model that remained P<0.10 in the multivariate model. Estimates are displayed for all variables that were included in the model.

<sup>d</sup> P-trend < 0.001

**Table 5. Association of Demographic, Behavioral, Virologic, and Clinical Factors with HIV-1 Genital Longitudinal Shedding Pattern Among 136 Participants with 3 or More Visits.<sup>a</sup>**

| Factor <sup>b</sup>                           | HIV-1 genital shedding category <sup>c</sup> |                                             |                                           | Univariate models <sup>d</sup> |                              | Models adjusted for ART and PVL <sup>e</sup> |                              |
|-----------------------------------------------|----------------------------------------------|---------------------------------------------|-------------------------------------------|--------------------------------|------------------------------|----------------------------------------------|------------------------------|
|                                               | Never Shedder <sup>f</sup><br>(N=55)         | Intermittent Shedder <sup>f</sup><br>(N=61) | Persistent Shedder <sup>f</sup><br>(N=20) | OR (95% CI)                    | P                            | OR (95% CI)                                  | P                            |
| Antiretroviral therapy                        |                                              |                                             |                                           |                                |                              |                                              |                              |
| No therapy                                    | 14 (25)                                      | 22 (36)                                     | 13 (65)                                   | Ref                            |                              | Ref                                          |                              |
| Mono/Combo                                    | 11 (20)                                      | 13 (21)                                     | 2 (10)                                    | 0.42 (0.17-1.05)               | 0.07                         | 0.63 (0.23-1.67)                             | 0.35                         |
| HAART                                         | 30 (55)                                      | 26 (43)                                     | 5 (25)                                    | <b>0.34 (0.16-0.72)</b>        | <b>0.005</b>                 | 0.50 (0.21-1.19)                             | 0.12                         |
| Plasma HIV-1 RNA level, copies/mL             |                                              |                                             |                                           |                                |                              |                                              |                              |
| ≤400                                          | 25 (49)                                      | 18 (31)                                     | 1 (5)                                     | Ref                            |                              | Ref                                          |                              |
| 401-3,999                                     | 14 (27)                                      | 12 (20)                                     | 2 (10)                                    | 1.39 (0.55-3.53)               | 0.48                         | 1.00 (0.36-2.81)                             | 0.99                         |
| 4,000-19,999                                  | 8 (16)                                       | 9 (15)                                      | 3 (15)                                    | 2.36 (0.82-6.74)               | 0.11                         | 2.01 (0.69-5.87)                             | 0.20                         |
| ≥20,000                                       | 4 (8)                                        | 20 (34)                                     | 14 (70)                                   | <b>11.65 (4.45-30.53)</b>      | <b>&lt;0.001<sup>g</sup></b> | <b>8.87 (3.21-24.54)</b>                     | <b>&lt;0.001<sup>g</sup></b> |
| Unknown                                       | 4                                            | 2                                           | 0                                         |                                |                              |                                              |                              |
| Per log <sub>10</sub> increase                |                                              |                                             |                                           | <b>2.64 (1.84-3.80)</b>        | <b>&lt;0.001</b>             | <b>2.47 (1.70-3.60)</b>                      | <b>&lt;0.001</b>             |
| CD4 cell count, cells/mm <sup>3</sup>         |                                              |                                             |                                           |                                |                              |                                              |                              |
| 0-200                                         | 6 (11)                                       | 10 (17)                                     | 8 (40)                                    | <b>5.67 (2.09-15.37)</b>       | <b>0.001<sup>g</sup></b>     | 2.49 (0.79-7.88)                             | 0.12                         |
| 201-350                                       | 13 (24)                                      | 18 (30)                                     | 7 (35)                                    | <b>2.86 (1.24-6.60)</b>        | <b>0.01</b>                  | 2.34 (0.92-5.93)                             | 0.07                         |
| 351-500                                       | 9 (16)                                       | 14 (23)                                     | 3 (15)                                    | 2.41 (0.96-6.01)               | 0.06                         | 2.58 (0.96-6.90)                             | 0.06                         |
| >500                                          | 27 (49)                                      | 18 (30)                                     | 2 (10)                                    | Ref                            |                              | Ref                                          |                              |
| Unknown                                       | 0                                            | 1                                           | 0                                         |                                |                              |                                              |                              |
| Alcohol consumption                           |                                              |                                             |                                           |                                |                              |                                              |                              |
| Abstainer                                     | 31 (56)                                      | 32 (53)                                     | 5 (25)                                    | Ref                            |                              | Ref                                          |                              |
| Light (<3 drinks/week)                        | 11 (20)                                      | 16 (27)                                     | 5 (25)                                    | 1.68 (0.76-3.71)               | 0.20                         | <b>2.58 (1.05-6.34)</b>                      | <b>0.04</b>                  |
| Moderate (3-13 drinks/week)                   | 8 (15)                                       | 7 (12)                                      | 2 (10)                                    | 1.04 (0.38-2.87)               | 0.94                         | 1.10 (0.36-3.32)                             | 0.87                         |
| Heavy (14 or more drinks/week)                | 5 (9)                                        | 5 (8)                                       | 8 (40)                                    | <b>4.69 (1.60-13.76)</b>       | <b>0.005<sup>h</sup></b>     | <b>3.29 (1.10-9.79)</b>                      | <b>0.03</b>                  |
| Any                                           | 24 (43.6)                                    | 28 (46.7)                                   | 15 (75.0)                                 | 1.86 (0.98-3.56)               | 0.06                         | <b>2.20 (1.08-4.49)</b>                      | <b>0.03</b>                  |
| Unknown                                       | 0                                            | 1                                           | 0                                         |                                |                              |                                              |                              |
| Cervical friability                           |                                              |                                             |                                           |                                |                              |                                              |                              |
| Absent                                        | 41 (87)                                      | 55 (95)                                     | 19 (100)                                  | Ref                            |                              | Ref                                          |                              |
| Present                                       | 6 (13)                                       | 3 (5)                                       | 0 (0)                                     | 0.26 (0.06-1.04)               | 0.06                         | 0.20 (0.03-1.20)                             | 0.08                         |
| Unknown                                       | 8                                            | 3                                           | 1                                         |                                |                              |                                              |                              |
| Herpes simplex virus type 2                   |                                              |                                             |                                           |                                |                              |                                              |                              |
| Absent                                        | 18 (33.3)                                    | 14 (24.1)                                   | 2 (10.0)                                  | Ref                            |                              | Ref                                          |                              |
| Present                                       | 36 (66.7)                                    | 44 (75.9)                                   | 18 (90.0)                                 | <b>2.13 (1.01-4.52)</b>        | <b>0.05</b>                  | <b>3.21 (1.34-7.67)</b>                      | <b>0.009</b>                 |
| Unknown                                       | 1                                            | 3                                           | 0                                         |                                |                              |                                              |                              |
| Human papillomavirus, all types               |                                              |                                             |                                           |                                |                              |                                              |                              |
| Absent                                        | 25 (61)                                      | 23 (49)                                     | 2 (15)                                    | Ref                            |                              | Ref                                          |                              |
| Present                                       | 16 (39)                                      | 24 (51)                                     | 11 (85)                                   | <b>2.70 (1.25-5.83)</b>        | <b>0.01</b>                  | 2.00 (0.83-4.81)                             | 0.12                         |
| Unknown                                       | 14                                           | 14                                          | 7                                         |                                |                              |                                              |                              |
| Trichomonas vaginalis                         |                                              |                                             |                                           |                                |                              |                                              |                              |
| Absent                                        | 51 (93)                                      | 57 (93)                                     | 15 (75)                                   | Ref                            |                              | Ref                                          |                              |
| Present                                       | 4 (7)                                        | 4 (7)                                       | 5 (25)                                    | 2.75 (0.87-8.75)               | 0.09                         | 1.37 (0.38-4.93)                             | 0.63                         |
| Summary variable over all visits <sup>f</sup> |                                              |                                             |                                           |                                |                              |                                              |                              |
| Use of HAART                                  |                                              |                                             |                                           |                                |                              |                                              |                              |
| Never                                         | 12 (22)                                      | 14 (23)                                     | 7 (35)                                    | Ref                            |                              | Ref                                          |                              |
| Intermittent                                  | 21 (38)                                      | 36 (59)                                     | 12 (60)                                   | 1.09 (0.49-2.42)               | 0.84                         | 1.57 (0.67-3.70)                             | 0.30                         |
| Continuous                                    | 22 (40)                                      | 11 (18)                                     | 1 (5)                                     | <b>0.26 (0.10-0.69)</b>        | <b>0.006<sup>h</sup></b>     | 0.46 (0.16-1.30)                             | 0.14                         |
| Detectable plasma HIV-1 RNA                   |                                              |                                             |                                           |                                |                              |                                              |                              |
| Always                                        | 20 (36)                                      | 24 (39)                                     | 18 (90)                                   | Ref                            |                              | Ref                                          |                              |
| Sometimes                                     | 16 (29)                                      | 32 (52)                                     | 2 (10)                                    | 0.54 (0.26-1.11)               | 0.09                         | 0.48 (0.23-1.02)                             | 0.06                         |
| Never                                         | 19 (35)                                      | 5 (8)                                       | 0 (0)                                     | <b>0.09 (0.03-0.27)</b>        | <b>&lt;0.001</b>             | <b>0.10 (0.03-0.32)</b>                      | <b>&lt;0.001</b>             |

**NOTE.** Data are no. (%) of population, unless otherwise indicated. Boldface type indicates statistical significance. ART, antiretroviral therapy; CI, confidence interval; HAART, highly active antiretroviral therapy; Ref, reference.

<sup>a</sup> Data is restricted to participants with a minimum of 3 and a maximum of 6 evaluated consecutive visits; only at most 1 consecutive visit can be skipped.

<sup>b</sup> All factors were evaluated but only those with associations where  $P < 0.10$  in univariate or adjusted models are included in the table.

<sup>c</sup> Genital shedding is defined as HIV RNA in CVL > 80 copies/mL. Shedding categories are defined as: never shedder, shed at 0 visits; intermittent, shed at 1 or 2 visits; and persistent shedder, shed at 3 or more visits.

<sup>d</sup> Ordinal logistic regressions are used to estimate odds ratios, 95% confidence intervals and  $P$ -values where data from the first evaluated visit contributes to the model.

<sup>e</sup> Adjusted models control for ART category (no therapy, mono/combo, HAART) and plasma HIV-1 RNA level category (≤400, 401-3999, 4000-19999, 20000+ copies/mL). The ART model is adjusted for plasma HIV-1 RNA level only, and the plasma HIV-1 RNA level model is adjusted for ART only.

<sup>f</sup> The adjusted model for use of HAART adjusts only for PVL. The adjusted model for Detectable plasma HIV-1 RNA adjusts only for ART.

<sup>g</sup>  $P$ -trend < 0.001; <sup>h</sup>  $P$ -trend < 0.01.

<sup>i</sup> Proportionality odds assumption was met for increasing shedding frequency by likelihood ratio test for all variables but Friability and Detectable plasma HIV-1 RNA. These are not reliable due to presence of 0.



Table 6

[Click here to download Supplemental Digital Content: Table 6.doc](#)

\*LWW Copyright Transfer and Disclosure Form

[Click here to download LWW Copyright Transfer and Disclosure Form: Copyright transfer.pdf](#)
